1     **LinkedSV for detection of mosaic structural variants from linked-**  
2                   **read exome and genome sequencing data**

3  
4     Li Fang<sup>1</sup>, Charlly Kao<sup>2</sup>, Michael V Gonzalez<sup>2</sup>, Fernanda A Mafra<sup>2</sup>, Renata Pellegrino da Silva<sup>2</sup>,  
5     Mingyao Li<sup>3</sup>, Sören Wenzel<sup>4</sup>, Katharina Wimmer<sup>4</sup>, Hakon Hakonarson<sup>2,5</sup>, Kai Wang<sup>1,6\*</sup>

6  
7     <sup>1</sup> Raymond G. Perelman Center for Cellular and Molecular Therapeutics, Children's Hospital of  
8     Philadelphia, PA 19104, USA

9     <sup>2</sup> Center for Applied Genomics, Children's Hospital of Philadelphia, PA 19104, USA

10    <sup>3</sup> Department of Biostatistics, University of Pennsylvania, Philadelphia, PA 19104, USA

11    <sup>4</sup> Section for Human Genetics, Department of Medical Genetics, Molecular and Clinical  
12    Pharmacology, Medical University Innsbruck, Innsbruck, Austria

13    <sup>5</sup> Department of Pediatrics, University of Pennsylvania, Philadelphia, PA 19104, USA

14    <sup>6</sup> Department of Pathology and Laboratory Medicine, University of Pennsylvania, Philadelphia,  
15    PA 19104, USA

16    \* Email: [wangk@email.chop.edu](mailto:wangk@email.chop.edu)

---

17 **Abstract**

18 Linked-read sequencing provides long-range information on short-read sequencing data by  
19 barcoding reads originating from the same DNA molecule, and can improve the detection and  
20 breakpoint identification for structural variants (SVs). We present LinkedSV for SV detection on  
21 linked-read sequencing data. LinkedSV considers barcode overlapping and enriched fragment  
22 endpoints as signals to detect large SVs, while it leverages read depth, paired-end signals and  
23 local assembly to detect small SVs. Benchmarking studies demonstrates that LinkedSV  
24 outperforms existing tools, especially on exome data and on somatic SVs with low variant allele  
25 frequencies. We demonstrate clinical cases where LinkedSV identifies disease causal SVs from  
26 linked-read exome sequencing data missed by conventional exome sequencing, and show  
27 examples where LinkedSV identifies SVs missed by high-coverage long-read sequencing. In  
28 summary, LinkedSV can detect SVs missed by conventional short-read and long-read  
29 sequencing approaches, and may resolve negative cases from clinical genome/exome sequencing  
30 studies.

31

32

## 33 **Introduction**

34 Genomic structural variants (SVs) have been implicated in a variety of phenotypic diversity and  
35 human diseases<sup>1</sup>. Several approaches such as split-reads<sup>2, 3</sup>, discordant read-pairs<sup>3, 4</sup>, and  
36 assembly-based methods<sup>5, 6</sup> have been developed for SV discovery from short reads. However,  
37 reliable detection of SVs from these approaches remains challenging. The split-reads and  
38 discordant read-pairs approaches require that the breakpoint-spanning reads/read-pairs are  
39 sequenced and confidently mapped. Genomic rearrangements are often mediated by repeats and  
40 thus breakpoint junctions of SVs are very likely to reside in repetitive regions<sup>7, 8, 9</sup>. Therefore,  
41 the breakpoint-spanning reads/read-pairs may be multi-mapped and have low mapping qualities.  
42 It is also difficult to perform assembly at repeat regions. Long-read sequencing such as SMRT  
43 sequencing and Nanopore sequencing are better for SV detection<sup>10, 11</sup>, but their application is  
44 limited by the higher cost and per-base error rate.

45 Linked-read sequencing technology developed by 10X Genomics combines the throughput and  
46 accuracy of short-read sequencing with the long-range information. In this approach, nanogram  
47 amounts of high-molecular weight (HMW) DNA molecules are dispersed into more than 1  
48 million droplet partitions with different barcodes by a microfluidic system<sup>12</sup>. Thus, only a small  
49 number of HMW DNA molecules (~10) are loaded per partition<sup>13</sup>. The HMW DNA molecules  
50 can be up to several hundred kilobases in size and have a length-weighted mean DNA molecule  
51 length of about 50 kb. Within an individual droplet partition, HMW DNA molecules are primed

52 and amplified by primers with a partition-specific barcode. The barcoded DNA molecules are  
53 released from the droplets and sequenced by standard Illumina paired-end sequencing<sup>12</sup>. The  
54 sequenced short reads derived from the same HMW DNA molecule can be linked together,  
55 providing long-range information for mapping, phasing and SV calling. In addition, linked-read  
56 whole exome sequencing (WES) has also been developed<sup>12</sup>, which provides an attractive and  
57 efficient option for clinical genetic testing.

58 In linked-read sequencing data, barcode similarities between any two nearby genome locations  
59 are very high, because the reads tend to originate from the same sets of HMW DNA molecules.

60 In contrast, barcode similarities between any two distant genome locations are very low, because  
61 the reads of the two genome locations originate from two different sets of HMW DNA molecules  
62 and it is highly unlikely that two different sets of HMW DNA molecules share multiple barcodes.

63 Thus, the presence of multiple shared barcodes between two distant locations indicates that the  
64 two distant locations are close to each other in the alternative genome<sup>14</sup>. A few pipelines and

65 software tools have adopted this principle to call SVs from linked-read sequencing data, such as  
66 Longranger<sup>12</sup>, GROC-SVs<sup>14</sup>, NAIBR<sup>15</sup>. Longranger is the official pipeline developed by 10X

67 Genomics. Longranger bins the genome into 10 kb windows and finds the barcodes of high  
68 mapping quality reads within each window. A binomial test is used to find all pairs of regions

69 that are distant and share more barcodes than what would be expected by chance. A sophisticated  
70 probabilistic model is used to assign a likelihood and remove low quality events<sup>12</sup>. GROC-SVs

71 uses a similar method to find candidate SV loci but performed assembly to identify precise  
72 breakpoint locations. GROCSV also provides functionality to interpret complex SVs<sup>14</sup>.  
73 NAIBR detects structural variants using a probabilistic model that incorporates signals from both  
74 linked-reads and paired-end reads and into a unified model<sup>15</sup>.

75 However, SV detection from linked-read datasets is still in the early stage. The available SV  
76 callers face challenges if we want to detect: i) SVs from targeted region sequencing (e.g. WES); ii)  
77 somatic SVs in cancer or somatic mosaic SVs that have low variant allele frequencies (VAFs,  
78 also known as variant allele fractions); iii) SVs of which the exact breakpoints have no coverage  
79 or are located in repeat regions. In this study, we introduce LinkedSV, a novel computational  
80 method and software tool for linked-read sequencing, which aims to address all the above  
81 challenges. LinkedSV detects large SVs using two types of evidence and quantifies the evidence  
82 using a novel probabilistic model. It also leverages read depth, paired-end signals and local  
83 assembly to detect small deletions. We evaluated the performance of LinkedSV on both whole-  
84 genome and whole-exome sequencing data sets. In each case, LinkedSV outperformed other  
85 existing tools, including Longranger, GROCSV and NAIBR, especially on exome data and on  
86 somatic SVs with low variant allele frequencies. We additionally demonstrated clinical cases  
87 where LinkedSV identified disease causal SVs from linked-read exome sequencing data missed  
88 by conventional exome sequencing, and showed examples where LinkedSV identifies SVs  
89 missed by high-coverage long-read sequencing.

90

## 91 **Results**

### 92 **Illustration of two types of evidence near SV breakpoints**

93 Two types of evidence may be introduced while a genomic rearrangement happens: 1) reads  
94 from one HMW DNA molecule which spans the breakpoint being mapped to two genomic  
95 locations and 2) reads from two distant genome locations that get mapped to adjacent positions.  
96 Both types of evidence can be used for SV detection.

97 First, we describe the signals of type 1 evidence. After reads mapping, the original HMW DNA  
98 molecules can be computationally reconstructed from the sequenced short reads using their  
99 barcodes and mapping positions. In order to distinguish them from the physical DNA molecules,  
100 we use fragments to refer to the computationally reconstructed DNA molecules. A fragment has  
101 a left-most mapping position, which we call L-endpoint, and a right-most mapping position,  
102 which we call R-endpoint. As a result of genomic rearrangement, reads from one breakpoint-  
103 spanning HMW DNA molecule would be mapped to two different genome loci on the reference  
104 genome. This split-molecule event has two consequences: 1) observing two separate fragments  
105 sharing the same barcode; 2) each of the two fragment has one endpoint close to the true  
106 breakpoints. Therefore, in a typical linked-read WGS data set, multiple split-molecule events

107 could be captured and we would usually observe multiple shared barcodes between two distant  
108 genome loci and multiple fragment endpoints near the breakpoints.

109 To illustrate this, Figure 1a shows the split-molecule events of a deletion, where breakpoints 1  
110 and 2 are marked by red arrows. Multiple fragment endpoints are enriched near the two  
111 breakpoints of a large deletion. This can be observed in deletions with minimal size of about 5-  
112 10 kb. Figure 1b and Supplementary Figures 1-3 show the patterns of enriched fragment  
113 endpoints that are introduced by different types of SVs. As an example, Figure 1c shows the  
114 number of fragment endpoints in a 5-kb sliding window near two deletion breakpoints, based on  
115 a 35X coverage linked-read WGS data generated from the NA12878 genome (genome of a  
116 female individual extensively sequenced by multiple platforms). At the breakpoints, the number  
117 of fragment endpoints in the 5-kb sliding window is more than 100 and is five times more than  
118 normal regions, forming peaks in the figure.

119 Since the fragments can be paired according to their barcodes, we can also observe fragment  
120 endpoints of this deletion in a two-dimensional view. As shown in Figure 1d, each dot indicates  
121 two endpoints from a pair of fragments which share the same barcode. The x-value of the dot is  
122 the position of the first fragment's R-endpoint and the y-value of the dot is the position of the  
123 second fragment's L-endpoint. The bottom panel and right panel in Figure 1d shows number of  
124 dots that are projected to the x-axis and y-axis. Similar with the one-dimensional plot (Figure 1c),  
125 a peak is formed near each breakpoint, which is marked by the red arrow. The background noise

126 of the two-dimensional plot is cleaner than the one-dimensional plot since the fragments that do  
127 not share barcodes are excluded. Therefore, the two-dimensional plot is more useful when the  
128 variant allele frequency (VAF) is very low and there are only a few supporting fragments.

129 Next, we describe the signals of type 2 evidence. The barcodes between two nearby genome  
130 locations is highly similar because the two locations are spanned by almost the same set of input  
131 HMW DNA molecules. However, due to the genome rearrangement, the reads mapped to the left  
132 side and right side of a breakpoint may originate from different locations of the alternative  
133 genome and thus have different barcodes (Figure 1e). Dropped barcode similarity between two  
134 nearby loci therefore indicates an SV breakpoint. LinkedSV detects this type of evidence by a  
135 twin-window method, which uses two adjacent sliding windows to scan the genome and find  
136 regions where the barcode similarity between the two nearby window regions is significantly  
137 decreased. Figure 1f illustrates an inversion breakpoint detected by LinkedSV from the  
138 NA12878 genome. The change of barcode similarity was plotted and a peak was formed at the  
139 breakpoint. After searching for the two types of evidence, LinkedSV combines the candidate SV  
140 regions and quantifies the evidence using a novel probabilistic model. The breakpoints are  
141 further refined using short-read information, including discordant read pairs and split-reads.

142

143 **Performance evaluation on simulated WGS data**



144 To assess LinkedSV's performance, we simulated a 35X linked-read WGS data set with 1,175  
145 SVs inserted using LRSIM<sup>13</sup> (see Methods for details). The breakpoints of the simulated SVs  
146 were designed to be located in repeat regions, since we found that LinkedSV and other available  
147 SV callers performed very well when the breakpoints were located in non-repeat regions, and  
148 thus we set to test the performances of all the SV callers under more challenging situations. This  
149 makes sense because SV breakpoints are more likely to be in repeat regions<sup>7, 8, 9</sup>, and because  
150 these situations represent those that are difficult to be addressed by conventional short-read  
151 sequencing approaches.

152 The simulated reads were aligned to the reference genome using the Longranger<sup>12</sup> package  
153 provided by 10X Genomics. The Longranger pipeline internally uses the Lariat aligner<sup>16</sup>, which  
154 was designed for the alignment of linked reads. SV calling was performed using LinkedSV as  
155 well as three other available SV callers designed for linked-read sequencing: Longranger,  
156 GROC-SVs<sup>14</sup> and NAIBR<sup>15</sup>. Two widely used short-read SV callers (Delly<sup>3</sup> and Lumpy<sup>17</sup>) were  
157 also used.

158 We used recalls, precisions and F1 scores to evaluate the performance of the six SV callers on  
159 this data set. As shown in Figure 2a, the four linked-read SV callers showed higher F1 scores  
160 than the two short-read SV callers. LinkedSV achieved the highest recall and F1 score among all  
161 methods. GROC-SVs had a good precision but its recall was lower than LinkedSV, so we further  
162 analyzed the false negative calls of GROC-SVs to understand the underlying reason. A major

163 portion of the false negative calls by GROC-SVs represents duplications that are smaller than  
164 twice the fragment length. For large duplications, the reads of the alternative allele are separated  
165 by a large gap so that we can observe two sets of fragments with the same set of barcodes, which  
166 indicate an SV (Supplementary Figure 4a). If the duplication is not large enough, the reads will  
167 be probably clustered into one fragment (Supplementary Figure 4b). Even in this case, we can  
168 observe enriched fragment endpoints near the duplication breakpoints in LinkedSV. As an  
169 example, Figure 2b shows the endpoint signal of a missed duplication call by GROC-SVs. The  
170 supporting fragments of this duplication is shown in Figure 2c. A detailed explanation of the  
171 pattern of duplication can be found in Supplementary Figure 1 and Supplementary Movie 1.  
172 Figure 2d showed the extra read depth in this region. We also evaluated the breakpoint precision  
173 of LinkedSV. Most of breakpoints predicted by fragment endpoints are within 20 bp (Figure 2e)  
174 and refined breakpoints using discordant read-pairs and split-reads have base-pair resolution  
175 (Figure 2f).

176

### 177 **Benchmarking on WGS data with somatic SVs of low VAF**

178 Somatic SVs are commonly found in cancer genomes<sup>18, 19, 20</sup>. However, due to the high  
179 heterogeneity of genomic alteration in cancer genomes, somatic SVs often have low (as opposed  
180 to ~50% in a germline genome) VAF and thus are more difficult to detect by SV callers designed  
181 for germline SVs. We simulated two WGS data sets with VAF of 10% and 20%, respectively.

---

182 Recalls, precisions and F1 values of the six SV callers were evaluated on both data sets (Figure  
183 3a, Figure 3b). When the VAF was 20%, the recall of LinkedSV (0.803) was much higher than  
184 that of Longranger (0.306), GROC-SVs (0.324) and NAIBR (0.679) The F1 score of LinkedSV  
185 (0.855) was also the highest among all the SV callers. When the VAF was 10%, LinkedSV still  
186 had a recall of 0.761, which was 72% higher than the second best SV caller NAIBR. Longranger  
187 detected 17% of the SVs while GROC-SVs almost completely failed to detect the SVs. The  
188 recall rates of Delly and Lumpy were 0.28 and 0.72, respectively, indicating that some of the  
189 SVs can be detected even without barcode information. These observations confirmed that other  
190 SV callers were mainly designed for germline genomes and had substantial difficulty in  
191 detecting SVs with somatic mosaicism. However, due to the combination of barcode overlapping  
192 and enriched fragment endpoints in our statistical model (see Methods for details), LinkedSV  
193 was able to achieve a good performance even when VAF was very low. We manually checked  
194 the barcode overlapping evidence of some SV calls using the Loupe software developed by 10X  
195 Genomics. Figure 3c shows an inversion that was missed by Longranger, and NAIBR but  
196 detected by LinkedSV (at VAF of 10%). Although the variant frequency is low, the overlapped  
197 barcodes between the two inversion breakpoints can be clearly visualized (in the black circles) in  
198 the figure. Figure 3d shows the supporting fragments of the inversion detected by LinkedSV.  
199 Each horizontal line represent two fragments that share the same barcode and support the SV.  
200 These results suggest that the manufacturer-provided software tool has limitations for SV  
201 detection, despite its strong functionality in visualization.

202 To test the performance of LinkedSV on the detection of disease casual SVs, we simulated one  
203 germline and two somatic (VAF = 10% and 20%) linked-read WGS data sets with 51  
204 deletions/duplications that were known to cause CNV (copy number variation) syndromes  
205 involved in developmental disorders (see Method for details). The size distribution of the events  
206 was shown in Supplementary Figure 5. The performances of LinkedSV as well as 5 other SV  
207 callers were shown in Supplementary Figure 6. The results were similar to those of the above  
208 simulations. LinkedSV had the highest F1 score on both germline and mosaic data sets, followed  
209 by NAIBR.

210

### 211 **Benchmarking of deletion detection on the HG002 genome**

212 Recently, the Genome in a Bottle (GIAB) Consortium released a benchmark call set for the  
213 evaluation of germline SV detection<sup>21</sup>. The benchmark set was based on the HG002 genome and  
214 was generated from integrating multiple SV calling methods from multiple sequencing platforms  
215 including 10X Genomics sequencing and PacBio long-read sequencing. The current GIAB call  
216 set only contains insertions and deletions. Since LinkedSV and the other three linked-read SV  
217 callers cannot detect insertions, we only benchmarked the performance to detect deletions using  
218 this benchmarking data set.

219 LinkedSV uses different strategies to detect deletions of different sizes. For deletions that are  
220 more than 10 kb, LinkedSV uses the two types of evidence from barcode signals as described  
221 above; for deletions that are within 1 - 10 kb, LinkedSV uses a combination of read depth and  
222 paired-end signals, with additional consideration of local haplotypes; for detection of SVs that  
223 are less than 1kb, LinkedSV uses a local assembly-based method. Specifically, we modified the  
224 FermiKit<sup>22</sup> *de novo* assembly pipeline to be a local assembler to improve speed and reduce the  
225 complexity of the assembly graph (see Method for details).

226 Supplementary Figure 7a showed the performance on detection of deletions that were more than  
227 10 kb. The recall and F1 score of LinkedSV was the highest among the seven methods. The four  
228 linked-read SV callers performed better than the three short-read SV callers in terms of F1 score.  
229 The performance on detection of deletions that within 1 - 10 kb were shown in Supplementary  
230 Figure 7b. The performance of LinkedSV was similar to Longranger, which also provided an  
231 algorithm to detect small deletions. NAIBR and GROC-SVs did not perform well because they  
232 were not designed to detect small events including small deletions. For deletions that were less  
233 than 1 kb, LinkedSV (with modified FermiKit) performed best (recall = 0.48, F1 score = 0.64), it  
234 detected more calls than the original *de novo* assembly version (recall = 0.43, F1 score = 0.60),  
235 indicating that local assembly reduced the complexity of the assembly graph and improved the  
236 performance. NAIBR, GROC-SVs and Lumpy did not perform well on deletions of this scale.

237 (Supplementary Figure 7c). Size distribution of SV events (including deletions, duplications and  
238 inversions) detected by LinkedSV was shown in Supplementary Figure 8.

239

#### 240 **Performance evaluation on simulated WES data**

241 Compared with WGS, WES is currently widely used in clinical settings to identify disease causal  
242 variants on patients with suspected genetic diseases, partly due to the lower cost of WES. Since  
243 WES only covers a small portion of regions in the whole genome, it is far more challenging to  
244 detect SVs from WES data, especially when the SV breakpoints are not in the capture regions.  
245 However, by combining linked-read sequencing with WES capture platforms, it is possible to  
246 alleviate this problem, and significantly improve the sensitivity of SV detection using WES.

247 To evaluate SV detection on linked-read WES data, we simulated a 40X coverage linked-read  
248 WES data set with 1,160 heterozygous SVs (see Methods for details). 44.3% of the breakpoints  
249 were not in exon regions. SV calling was performed using the six SV callers. As shown in Figure  
250 4a, LinkedSV had the highest recall (0.79) and highest F1 score (0.86). In terms of the balanced  
251 accuracy (F1 score), NAIBR was the second best caller, followed by GROC-SVs.

252 We analyzed false negative calls of the second best SV caller NAIBR. NAIBR tends to miss  
253 some SV events that have shared barcodes but lack short-read support. For example, Figure 4b  
254 showed a deletion between chr1:172545561-173504265. Both breakpoints were located outside

255 of capture regions. Breakpoint 1 (chr1:172545561) was 768 bp away from the nearest capture  
256 region and breakpoint 2 (chr1: 173504265) was 392 bp away from the nearest capture region.  
257 Unfortunately, no discordant read pairs that support the deletion could be found. However,  
258 shared barcodes between the two breakpoints were clearly indicated by the Loupe software  
259 (Figure 4b). In addition, LinkedSV also detected 28 pairs of fragments that share the same  
260 barcodes and support the SV. These fragments were plotted in Figure 4c. Although no short-read  
261 support was found, the SV type could be determined using the pattern of enriched fragment  
262 endpoints shown in Figure 1b. In this SV event, R-endpoints were highly enriched for the first  
263 set of fragments and L-endpoints were highly enriched for second set of fragments. Thus, the SV  
264 type was predicted as deletion.

265

#### 266 **Detection of *F8* inversion from clinical WES data**

267 We also tested the performance of LinkedSV on several clinical samples with linked-read WES  
268 data. First, we applied LinkedSV on a WES sample of a male individual with Hemophilia A.  
269 Previous experiments had shown that the patient had type I inversion of the *F8* gene, where the  
270 two breakpoints resided in intronic/intergenic regions, thus the inversion and its breakpoints  
271 cannot be inferred from conventional WES. The *F8* gene is located in Xq28. The intron 22 of *F8*  
272 gene contains a GC-rich sequence (named int22h-1) that is duplicated at two positions towards  
273 the Xq-telomere (int22h-2 and int22h-3). Int22h-2 has the same direction with int22h-1 while

---

274 int22h-3 has the inverted direction. The type I inversion is induced by the recombination  
275 between int22h-1 and int22h-3<sup>23, 24</sup> (Figure 5a). BLAST alignment of int22h-1 and int22h-3  
276 showed that the two sequences had 99.88% identity. Since the breakpoints were located in two  
277 segmental duplications with nearly identical sequences, the inversion is undetectable by  
278 conventional short-read sequencing. Delly<sup>3</sup> and Lumpy<sup>17</sup> failed to detect the inversion from the  
279 linked-read WES data (results were shown in Supplementary Tables 1-2).

280 Longranger, GROCSVs, NAIBR and LinkedSV were also used to detect SVs from this sample.  
281 None of the first three methods detected this inversion (results were shown in Supplementary  
282 Tables 3-5), although the overlapping barcodes can be visualized using the Loupe software  
283 (Figure 5b). However, LinkedSV successfully detected this inversion by combining two types of  
284 evidence. As described above, barcode similarity between two nearby regions are very high but  
285 drops suddenly at the breakpoints. Figure 5c shows the suddenly drop of barcode similarity at the  
286 two breakpoints. Each dot in the figure represents the reciprocal of the barcode similarity  
287 between its left 40 kb window and right 40 kb window thus the Y value of the dots are reversely  
288 related to the barcode similarity and positively related to the probability of being a breakpoint.  
289 The barcode similarities are lowest at the two breakpoints and thus form two peaks in the figure  
290 (marked by red arrow). In addition, LinkedSV also identified the supporting fragments of the SV  
291 using type 1 evidence (Figure 5d). The predicted breakpoint positions are consistent with the  
292 genomic positions of int22h-1 and int22h-3.



293

294 **Detection of mosaic *NFI* deletion from clinical WES data**

295 Another linked-read WES sample was from an individual who was clinically diagnosed with  
296 Neurofibromatosis type 1. Neurofibromatosis type 1 is caused by mutations in the *NFI* gene on  
297 chromosome 17q11.2, which encodes neurofibromin, a GTPase activating protein that has a role  
298 in the regulation of RAS signaling. Since standard genetic testing techniques including cDNA  
299 sequencing and multiplex ligation-dependent probe amplification (MLPA) revealed no  
300 constitutional or mosaic pathogenic mutation in this patient, we hypothesized that this patient  
301 may carry an SV affecting the *NFI* gene that escapes the detection by the applied standard  
302 techniques. To evaluate LinkedSV, we utilized the 10X Genomics Chromium platform to  
303 generate linked-read WES data to confirm and resolve the mutation. SV detection was conducted  
304 using the four linked-read SV callers as well as Delly and Lumpy. Longranger detected  
305 overlapped barcodes between exon 54 of the *NFI* gene and intron 3 of *RAB11FIP4*. However,  
306 the SV type was unknown and no supporting read pairs or split-reads were found. GROCC-SVs,  
307 NAIBR, Delly and Lumpy failed to detect this SV (Supplementary Tables 6-9). As shown in  
308 Figure 6a, LinkedSV detected 16 fragment pairs that may support a deletion spanning the region  
309 of chr17:29684175-29822527. In addition, a discordant read pair spanning the two breakpoints  
310 were found (Figure 6b), which gave further evidence supporting the deletion. The breakpoints  
311 were estimated from this discordant read pair and thus the resolution is a few hundred base pairs.

---

312 In Figure 6, each colored line represent a reconstructed fragment, and ~13% of the fragments  
313 belong to the variant allele, indicating the somatic mosaicism of this deletion. The right  
314 breakpoint was within an AluJr sequence masked by repeat masker, which may explain why the  
315 deletion was difficult to be detected by conventional methods.

316 In comparison, the clinical lab used massive parallel sequencing (TruSightCancer panel on a  
317 MiSeq platform (Illumina)) and successfully revealed in exon 54 a transition of *NFI* sequences  
318 into a non-*NFI* derived sequence. This sequence transition at *NFI* position c.7886\_7887 was  
319 present in 8% of the reads covering this site in germline DNA of the patient. Analysis of the  
320 reads displaying the aberrant sequence in exon 54 showed that the non-*NFI* derived sequence  
321 was part of an Alu element that matched best a sequence in intron 3 of the *RAB11FIP4* gene  
322 located 138 kb downstream of *NFI* exon 54. These results suggested a low-level (~8%)  
323 mosaicism of a deletion encompassing the region intervening between *NFI*:c.7886 and  
324 *RAB11FIP4*:c.337-22216, so that the true deletion spans chr17:29684367-29822453, which is  
325 very similar to our estimated breakpoints from LinkedSV above. In summary, our analysis on  
326 two clinical samples with *F8* inversion and *NFI* deletion demonstrated the unique advantage of  
327 linked-read sequencing in confirming and resolving structural variants in repetitive regions and  
328 challenging situations.

329

330 **Comparison with SVs detected from long-read sequencing**

---

331 We previously reported the *de novo* genome assembly of a Chinese individual (HX1)<sup>25</sup>. This  
332 genome was sequenced deeply at 103X coverage using PacBio long-read sequencing. Recently,  
333 the developers of SMRT-SV<sup>10,26</sup> reported the SV calls of HX1 detected from the PacBio data.  
334 Additionally, we have also generated a 37X linked-read WGS dataset on HX1. Therefore, in the  
335 current study, we detected SVs from the linked-read data using LinkedSV and compared the SV  
336 calls detected by LinkedSV and SMRT-SV. The SMRT-SV call set has 17 large deletions  
337 ( $\geq 10\text{kb}$ ), all of which were detected by LinkedSV. In addition, LinkedSV detected another 46  
338 large deletions, which were missed by SMRT-SV. To validate these deletion calls, we mapped  
339 the PacBio reads of HX1 to GRCh38 reference genome using minimap2<sup>27</sup>, and manually  
340 examined all the SV affected regions in both PacBio data and linked-read data, using the  
341 Integrative Genomics Viewer (IGV)<sup>28</sup> and the Loupe software tool. We classify a deletion as a  
342 true deletion if there are decreased read depth in the deletion region and clear boundaries at the  
343 breakpoints. After the manual inspection, we found that among the 46 deletions that are only  
344 detected by LinkedSV, 34 of them have clear evidence of deletion in the WGS data; 10 of them  
345 are complex SV events that need to be fully resolved; and 2 of them are false positive events.  
346 Figure 7a-c showed an example of a deletion that were detected by LinkedSV but missed by  
347 SMRT-SV. This is a 45 kb deletion located in chr2:110395971-110441346. A deletion pattern  
348 was clearly indicated by the Loupe software tool (Figure 7a). After examine the PacBio reads,  
349 we were able to found clipped reads at the breakpoint positions (Figure 7b, 7c). However, for  
350 most of the clipped reads, the clipped sequences were aligned to the hs38d1 decoy sequence,

351 except for 5 reads with clipped sequence > 7 kb. Analysis of the 5 reads revealed that the two  
352 breakpoints in chr2 were not directly joined. There was a 6 kb insertion in between. The inserted  
353 sequence was from hs38d1 (coordinates: 1381394-1387327). The proposed variant allele was  
354 shown in Supplementary Figure 9a. To validate this deletion/insertion event, we aligned all the  
355 PacBio reads to a new reference genome with all sequences of GRCh38 plus hs38d1 and the  
356 sequence of the proposed variant allele. The reads aligned to the proposed variant allele were  
357 shown in Supplementary Figure 9b. There were 33 reads spanning the chr2-hs38d1 junction, 48  
358 reads spanning the hs38d1-chr2 junction and 13 reads spanning both junctions. *De novo*  
359 assembly of all the reads aligned to the proposed variant allele generated a single contig of 42.7  
360 kb, which also spanned both junctions (Supplementary Figure 9b, bottom track). These analysis  
361 showed that the large deletion event detected by LinkedSV is true and with PacBio long reads  
362 the details of complex SV events could be resolved.

363 We also compared the duplication calls of LinkedSV and SMRT-SV and manually examined  
364 discordant SV calls. LinkedSV reported 6 large duplications ( $\geq 10$ kb), 5 of which were not  
365 reported by SMRT-SV. Figure 7d-f showed the evidence of a 61 kb duplication call  
366 (chr19:27338390-27399298), which was only reported by LinkedSV. A two-fold increase of  
367 read depth could be observed in the duplication region (Figure 7d), and the breakpoints were also  
368 clearly indicated in the alignments of PacBio long reads, as shown in IGV (Figure 7e,f). The read  
369 depths of PacBio raw reads and error-corrected reads were shown in Supplementary Figure 10.

370 The increase of read depth in the duplication region can also be observed. After the manual  
371 inspection of the left duplication breakpoint, a small duplication event was found next to the  
372 main event. The boundaries of the small duplication can be observed in the alignments of linked  
373 reads and error-corrected PacBio reads, but not in the alignments of PacBio raw reads,  
374 potentially because of mapping errors (Supplementary Figure 11). SMRT-SV reported 194 large  
375 duplications ( $\geq 10$  kb). Unexpectedly, 193 of the duplication calls were not detected by  
376 LinkedSV. In addition, none of these duplications could be detected by Sniffles<sup>11</sup>, another widely  
377 used long-read SV caller. After comparing with the segmental duplication database<sup>29</sup>, we found  
378 that 182 of the 193 duplication calls (94.3%) were located in large segmental duplication regions.  
379 Both long reads and linked reads could not be reliably mapped in these regions. As an example,  
380 we plotted the read depth distribution in the region around a 25 kb duplication call of SMRT-SV.  
381 Neither long reads (Supplementary Figure 12a) nor linked reads (Supplementary Figure 12b) had  
382 mapping quality  $>20$  in the duplication region. Therefore, SV detection in the super-large  
383 segmental duplication regions is still very challenging. In summary, our comparative analysis  
384 demonstrated unique advantages of linked-read WGS in resolving large SVs that may be failed  
385 by even long-read sequencing platform with very deep coverage.

386

## 387 **Discussion**

388 In this study, we present LinkedSV, a novel open source algorithm for structural variant  
389 detection from linked-read sequencing data. We assessed the performance of LinkedSV on three  
390 simulated data sets and two real data sets. By incorporating the two types of evidence as outlined  
391 below, LinkedSV outperforms all existing linked-read SV callers including Longranger, GROCC-  
392 SVs and NAIBR on both WGS and WES data sets.

393 Type 1 evidence gives information about which two genomic positions are connected in the  
394 alternative genome. It has two observations: 1) fragments with shared barcodes between two  
395 genomic locations and 2) enriched fragment endpoints near breakpoints. Current existing linked-  
396 read SV callers only use the first observation to detect SVs while LinkedSV incorporates both  
397 observations in the statistical model and is therefore more sensitive and can detect SVs with  
398 lower allele frequencies, such as somatic SVs in cancer genomes and mosaic structural variations.

399 Type 2 evidence gives information about which genomic position is interrupted with the  
400 observation that the reads on the left side and right side of a genomic position have different  
401 barcodes and should be derived from different HMW DNA molecules. LinkedSV is the only SV  
402 caller that use type 2 evidence to detect breakpoints. Type 2 evidence is independent to type 1  
403 evidence, and gives additional confidence to identify the breakpoints. In addition, type 2  
404 evidence can be detected locally, which means we can detect a weird genomic location without  
405 looking at the barcodes of the other genomic locations. This is particularly useful in two  
406 situations: 1) novel sequence insertions where there is only one breakpoint; 2) only one

407 breakpoint is detectable and the other breakpoint located in a region where there is little coverage  
408 within 50 kb, which is often the case in target region sequencing. As LinkedSV incorporates two  
409 types of evidence from barcodes, and performs local assembly to detect small deletions, the  
410 computation time of LinkedSV is longer than NAIBR, but shorter than GROC-SVs and  
411 Longranger (Supplementary Figure 13).

412 In recent years, WES has been widely used to identify disease causal variants for patients with  
413 suspected genetic diseases in clinical settings. Identification of SVs from WES data sets are more  
414 challenging because the SV breakpoints may not be in the capture regions and thus there would  
415 be little coverage at the breakpoints. Linked-read sequencing increases the chance of resolving  
416 such type of SVs by providing long-range information. As well as there are a few capture regions  
417 nearby, the fragments can still be reconstructed and type 1 and type 2 evidence can still be  
418 observed. Our statistical models for both type 1 evidence and type 2 evidence were designed to  
419 handle both WGS and WES data sets. GROC-SVs uses a local-assembly method to verify the SV  
420 call, which requires sufficient coverage at the breakpoints. By using these two types of evidence,  
421 LinkedSV can be less relied on short-read information (e.g. pair-end reads and split-reads). We  
422 demonstrated that LinkedSV has better recall and balanced accuracy (F1 score) on the simulated  
423 WES data set and can detect SVs even when the breakpoints were not located in capture regions  
424 and have no short-read support. In addition, LinkedSV is also the only SV caller that clearly  
425 detected the *F8* intron 22 inversion and *NFI* deletion from the clinical WES data sets.

426 Linked-read sequencing has several advantages over traditional short-read sequencing on the  
427 purpose of SV detection. First, the human genome is highly repetitive. Previous studies have  
428 shown that SVs are closely related to repeats and many SVs are directly mediated by  
429 homologous recombination between repeats <sup>30</sup>. In traditional short-read sequencing, if the  
430 breakpoint falls in a repeat region, the supporting reads would be multi-mapped and thus the SV  
431 cannot be confidently identified. However, this type of SVs are detectable by linked-read  
432 sequencing when the HMW DNA molecules span the repeat region. We can observe type 1 and  
433 type 2 evidence in the non-repeat region nearby. In our benchmarking, LinkedSV detected more  
434 SVs than Delly and Lumpy, especially when the VAF is low. Secondly, SVs are undetectable  
435 from traditional short-read sequencing if there is little coverage at the breakpoints, which is often  
436 the case in WES data sets. As described above, this type of SV can also be resolved by linked-  
437 read sequencing and LinkedSV. Third, linked-read sequencing requires less coverage for  
438 detection of SVs with low variant allele frequencies. In linked-read sequencing data, short read  
439 pairs are sparsely and randomly distributed along the HMW DNA molecule. In a typical linked-  
440 read WGS data set, the average distance between two read pairs derived from the same HMW  
441 DNA molecule is about 1000 bp and each HMW DNA molecule only has a short-read coverage  
442 of about 0.2X. Therefore, there are about 150 HMW DNA molecules (reconstructed fragments)  
443 covering a genomic location of 30X depth. An SV of 10% VAF will has 15 supporting fragment  
444 pairs in a 30X depth location in linked-read WGS data set, which is sufficient to be detected by



445 LinkedSV. However, an SV of 10% VAF will only has 3 supporting read pairs in a 30X depth  
446 location in traditional short read WGS, which makes the detection more challenging.

447 Linked-read sequencing also has several advantages over long-read sequencing in terms of SV  
448 detection. The fragment length of linked-reads (typically 50-100 kb) is longer than the read  
449 length of regular long-read sequencing (typically 20-30 kb). Therefore, linked-read sequencing  
450 has unique advantages for detection of large SVs. In our study, LinkedSV detected several large  
451 SVs that were missed in the long-read SV call set. We also showed that the sequencing error (13-  
452 15%) of long-read sequencing technologies potentially had a negative effect on reads mapping  
453 and subsequent SV calling (Supplementary Figure 11). In terms of library preparation, Linked-  
454 read sequencing only requires 1 ng input DNA, which is two orders of magnitude smaller than  
455 what is needed by long-read sequencing. Therefore, disease samples of very low DNA amount  
456 can be easily sequenced by linked-read sequencing. In addition, SNPs, indels and SVs can be  
457 detected from linked-read sequencing simultaneously.

458 LinkedSV may have limitations on detection of SVs in large segmental duplication regions,  
459 where the linked reads have low mapping qualities. SMRT-SV was able to find 194 large  
460 duplications in the HX1 genome, which were not detected by LinkedSV and Sniffles, two  
461 alignment-based SV callers. SMRT-SV detects SVs using an assembly-based approach. During  
462 the assembly process, the assembly contigs were error corrected and polished by the PacBio  
463 reads. Therefore, the assembly contigs are potentially more accurate and longer than each of the

464 raw reads. Thus, it is possible for SMRT-SV to detect SVs in these large segmental duplication  
465 regions.

466 The linked-read technology provides strong evidence to detect large SVs, but it provides little  
467 additional evidence to detect small SVs. Therefore, LinkedSV has limited power to detect small  
468 SVs such as small duplications and inversions. However, based on our analysis of SV size  
469 distribution, large SVs are associated with diseases such as cancers and CNV syndromes  
470 (Supplementary Note 2). Therefore, we expect that linked-read technology can help resolve  
471 disease associated SVs. Similar to the existing linked-read SV callers, LinkedSV currently does  
472 not handle insertions and repeat expansions. As a future direction, we plan to detect novel  
473 sequence insertions using type 2 evidence, since this type of SV also cause a decrease of barcode  
474 similarity between nearby regions and can be detected by the twin-window method. The exact  
475 insertion sequence may then be inferred from the assembly of all the reads that share barcodes  
476 with the candidate breakpoint. LinkedSV currently already supports local assembly to detect  
477 deletions, but it has not been parameterized and optimized to be combined with type 2 evidence  
478 for detection of insertions.

479 In summary, we present LinkedSV, a novel SV caller for linked-read sequencing. LinkedSV  
480 outperformed current existing SV callers, especially for identifying SVs with low allele  
481 frequency or identifying SVs from target region sequencing such as linked-read WES. We expect

482 that LinkedSV will facilitate the detection of SVs from linked-read sequencing data and help  
483 solve negative cases from conventional short-read sequencing.

## 484 **Methods**

### 485 **Breakpoint detection from type 1 evidence**

486 First, LinkedSV reconstructs the original long DNA fragments from the reads using mapping  
487 positions and barcode information. All mapped reads are partitioned according to the barcode  
488 and sorted by mapping position. We define gap distance as the distance between two nearest  
489 reads with the same barcode. Two nearby reads are considered from the same long DNA  
490 fragment if they have the same barcode and their gap distance is less than a certain distance  $G$ .  $G$   
491 is determined using two steps. First, we use  $G = 50$  kb (the same as Zheng et.al <sup>12</sup>) to group the  
492 reads into fragments. This value is suitable for detection of large SVs. However, it may be too  
493 large for detection of SVs that are smaller than 50 kb. Therefore, we calculate the empirical  
494 distribution of intra-fragment gap distance, which is the distance of two nearby reads that are  
495 grouped in one fragment. The empirical distribution of intra-fragment gap distance is calculated  
496 from all the fragments, and we assign  $G$  as the 99<sup>th</sup> percentile of this distribution.  $G$  is a fixed  
497 number for all fragments and is usually between 5-15 kb, depending on the data set. Fragments  
498 with a gap distance larger than  $G$  potentially span a breakpoint and will be separated to two  
499 fragments.

500

501 In non-SV regions, all the reads from the same HMW DNA molecule would be reconstructed  
502 into a single DNA fragment. The reads from the breakpoint-spanning HMW DNA molecule will  
503 be mapped to two different positions in the genome. As illustrated in the Result section, this  
504 split-molecule event has two consequences: 1) observing two fragments sharing the same  
505 barcode; 2) each of the two fragment has one endpoint close to the breakpoints. Therefore, we  
506 could observe enriched fragment endpoints near the breakpoints, in both one-dimensional view  
507 (Figure 1c) and two-dimensional view (Figure 1d). The type of the endpoints (L-endpoint or R-  
508 endpoint) that enriched near the breakpoints depends on the type of SV (Figure 1b). The two-  
509 dimensional view has less background noise because the fragments that do not share barcodes  
510 and thus do not support the SVs are excluded. Therefore, we detect the enriched endpoints in the  
511 two-dimensional view.

512 We now describe how we detect the type 1 evidence of deletion calls, but the method can be  
513 applied to other types of SVs. We define fragment pair to be two fragments sharing the same  
514 barcode. Let  $b_1, b_2$  be the positions of the two breakpoint candidates (assuming  $b_1 < b_2$ ). Let  $n$  be  
515 the number of fragment pairs that may support the SV between  $b_1$  and  $b_2$ . Let  $F_{i1}, F_{i2}$  denote the  
516  $i^{\text{th}}$  fragment pair that support the SV. Let  $B(F)$  denote the barcode of fragment  $F$ . Therefore, we  
517 have:

518 
$$B(F_{i1}) = B(F_{i2}), i = 1, 2, 3, \dots, n. (1)$$

---

519 Let  $L(F)$  denote the L-endpoint position (i.e., left-most position) of fragment  $F$ ,  $R(F)$  denote the  
520 R-endpoint position (i.e., right-most position) of fragment  $F$ . Since this is a deletion and  $b_1 < b_2$ ,  
521  $R(F_{i1})$  is the position on  $F_{i1}$  that is closest to  $b_1$  and  $L(F_{i2})$  is the position on  $F_{i2}$  that is closest to  
522  $b_2$  (Supplementary Figure 14a). The distance between the fragment endpoint and its  
523 corresponding breakpoint should be within gap distance distribution (explained in  
524 Supplementary Figure 15). Therefore, for almost all ( $99\% \times 99\%$ ) of the fragment pairs, we have:

$$525 \quad b_1 - G \leq R(F_{i1}) \leq b_1; b_2 \leq L(F_{i2}) \leq b_2 + G. \quad (2)$$

526 As described above,  $G$  is the 99<sup>th</sup> percentile of the empirical distribution of intra-fragment gap  
527 distance.

528 If we regard  $(R(F_{i1}), L(F_{i2}))$  as a point in a two-dimensional plane, according to equation (2), for  
529 almost all (98.01%) of the fragment pairs  $(F_{i1}, F_{i2})$ ,  $((R(F_{i1}), L(F_{i2})))$  is restricted in a  $G \times G$   
530 square region with the point  $(b_1, b_2)$  being a vertex (Supplementary Figure 14b).

531 We used a graph-based method to fast group the points into clusters and find square regions  
532 where the numbers of points were more than expected. First, every possible pair of endpoints  
533  $(R(F_1), L(F_2))$  meeting  $B(F_1) = B(F_2)$  formed a point in the two-dimensional plane. Each point  
534 indicated a pair of fragments that share the same barcode. For example, if 10 fragments share the  
535 same barcode,  $C_{10}^2$  pairs of endpoints will be generated. A point/pair of endpoints may or may  
536 not support an SV because there are two possible reasons for observing two fragments sharing

---

537 the same barcode: 1) the two fragments originated from two different HMW DNA molecules but  
538 were dispersed into the same droplet partition and received the same barcode; 2) the two  
539 fragments originated from the same HMW DNA molecule but the reads were reconstructed into  
540 two fragments due to an SV. The points are sparsely distributed in the two-dimensional plane  
541 and it is highly unlikely to observe multiple points in a specific region. Next, a k-d tree ( $k = 2$ )  
542 was constructed, of which each node stores the  $(X, Y)$  coordinates of one point. A k-d tree is a  
543 binary tree that enable fast query of nearby nodes. Therefore, we could quickly find all pairs of  
544 points within a certain distance. Any two points  $(x_1, y_1)$  and  $(x_2, y_2)$  were grouped into one cluster  
545 if  $|x_1 - x_2| < G$  and  $|y_1 - y_2| < G$ . For each cluster, if the number of points in the cluster was more  
546 than a user-defined threshold (default: 5), it was considered as a potential region of enriched  
547 fragment endpoints. If the points in the cluster were not within a  $G \times G$  square region, we used a  
548  $G \times G$  moving square to find a square region where the points are best enriched. Theoretically,  
549 the best enriched square region should contain 98.01% ( $0.99 \times 0.99$ ) of the points, according to  
550 equation (2). The predicted breakpoints were the X and Y coordinates of the right-bottom vertex  
551 of the square. The points in the square region were subjected to a statistical test describe below.

552

### 553 **Quantification of type 1 evidence**

554 Let  $n$  be the number of points in the square region. Each point corresponds to a pair of fragment  
555  $F_{i1}, F_{i2}$ , ( $i = 1, 2, 3, \dots, n$ ) that may support the SV. Let  $b_1$  and  $b_2$  be the coordinates of the

---

556 predicted breakpoint. Equation (1) and (2) hold for all the fragment pairs  $F_{i1}, F_{i2}$  ( $i = 1, 2, 3, \dots,$   
557  $n$ ). We then test the null hypothesis that there is no SV between  $b_1$  and  $b_2$ .

558 First, we test the hypothesis that the  $n$  fragment pairs  $F_{i1}, F_{i2}$  have originated from different DNA  
559 molecules, but coincidentally received the same barcode. Here we define two fragments  $F_a$  and  $F_b$   
560 as an independent fragment pair if  $F_a$  and  $F_b$  share the same barcode but have originated from  
561 different DNA molecules. Thus,  $R(F_a)$  and  $L(F_b)$  are independent variables. All the fragment  
562 pairs that do not support SVs are independent fragment pairs. It is reasonable to assume the  
563 generation of HMW DNA molecules from chromosomal DNA is a random process thus both  
564  $R(F_a)$  and  $L(F_b)$  are uniformly distributed across the chromosome. Therefore, the point  $((R(F_a),$   
565  $L(F_b))$  is equal likely to be in any place in the two-dimensional plane. Technically, we connect  
566 all the chromosomes in a head-to-tail order so that both intra-chromosomal events and inter-  
567 chromosomal can be analyzed at the same time. Observing at least  $n$  independent fragment pairs  
568 meeting equation (2) is equivalent to the event that observing at least  $n$  points  $((R(F_{i1}), L(F_{i2}))$   
569 located in a squared region with an area of  $G^2$  on the two-dimensional plane. The probability of  
570 this event is:

571 
$$p_1 = \sum_{j=n}^N \text{Binomial\_pmf}(n, N_{\text{ifp}}, \frac{G^2}{L^2}), (3)$$

572 where Binomial\_pmf is the probability mass function of binomial distribution;  $L$  is the total  
573 length of the genome (also the side length of the two-dimensional plane);  $N_{\text{ifp}}$  is the total number  
574 of independent fragment pairs.

---

575 Since we are doing multiple hypothesis testing in the data set, the probability need to be adjusted.

576 
$$p_{\text{adjusted1}} = p_1 \frac{G^2}{L^2}. \quad (4)$$

577 We reject the hypothesis if  $p_{\text{adjusted1}} < p_{\text{threshold}}$ .  $p_{\text{threshold}}$  is  $10^{-5}$  by default.

578 Next, we test the hypothesis that fragment pairs  $F_{i1}, F_{i2}$  ( $i = 1, 2, 3, \dots, n$ ) have originated from  
579 the same DNA molecule, but no reads were sequenced in the gap between  $R(F_{i1})$  and  $L(F_{i2})$ . Let  
580  $g_i$  denote the length of the gap between  $F_{i1}$  and  $F_{i2}$ ,  $\bar{g}$  denote the mean of  $g_i$ , and we have:

581 
$$g_i = L(F_{i2}) - R(F_{i1}), \quad (5)$$

582 
$$\bar{g} = \frac{1}{n} \sum_{i=1}^n g_i. \quad (6)$$

583 If  $\bar{g}$  is too large such that the probability of no reads being generated is smaller than a threshold,  
584 we can reject this hypothesis.

585 Similar to the model described by 10X Genomics<sup>12</sup>, we assume the read generation on a DNA  
586 molecule is a Poisson process with constant rate  $\lambda$  across the genome. Let  $r$  be the number of  
587 reads generated in a region of length  $g$ , then  $r \sim \text{Pois}(\lambda g)$ . Let  $P_{\text{gap}}(g)$  denote the probability of no  
588 read being generated in length  $g$ , we have:

589 
$$P_{\text{gap}}(g) = P(r = 0 | \lambda g) = \frac{e^{-\lambda g} (\lambda g)^0}{0!} = e^{-\lambda g} \quad (7)$$

590 Therefore, the gap length  $g_i$  follows Exponential distribution:  $g_i \sim \text{Exp}(\lambda)$ . Recalling that 1) the  
591 Exponential distribution with rate parameter  $\lambda$  is a Gamma distribution with shape parameter 1



---

592 and rate parameter  $\lambda$ ; 2) the sum of  $n$  independent random variables from Gamma ( $1, \lambda$ ) is a  
593 Gamma random variable from Gamma ( $n, \lambda$ ), we have:

594 
$$\sum_{i=0}^n g_i \sim \text{Gamma}(n, \lambda), (8)$$

595 
$$\bar{g} = \frac{\sum_{i=0}^n g_i}{n} \sim \text{Gamma}(n, n\lambda), (9)$$

596 Therefore, the probability that observing  $n$  gap regions with mean length equal to or larger than  $\bar{g}$   
597 is:

598 
$$p_2 = 1 - \text{Gamma\_cdf}(n, n\lambda), (10)$$

599 where Gamma\_cdf is the cumulative distribution function of Gamma distribution.

600 Since we are doing multiple hypothesis testing in the data set, the probability need to be adjusted.

601 
$$p_{\text{adjusted2}} = p_2 \frac{N_{\text{rp}}}{n}, (11)$$

602 where  $N_{\text{rp}}$  is the total number of read pairs.

603 We reject the hypothesis if  $p_{\text{adjusted2}} < p_{\text{threshold}}$ .  $p_{\text{threshold}}$  is set as  $10^{-5}$  by default. If both  $p_{\text{adjusted1}}$   
604 and  $p_{\text{adjusted2}}$  are less than  $p_{\text{threshold}}$ , we accept the hypothesis that the SV is true. For each  
605 candidate SV, we report a confidence score for type 1 evidence as:

606 
$$\text{Confidence score 1} = -\log_{10}(\max(p_{\text{adjusted1}}, p_{\text{adjusted2}})). (12)$$

607

---

608 **Breakpoint detection from type 2 evidence**

609 Barcode similarity between two nearby regions is very high because the reads originate from  
610 almost the same set of HMW DNA molecules. However, at the SV breakpoint, the aligned reads  
611 from the left side and right side may have originated from different locations in the alternative  
612 genome. Thus, the barcode similarity between the left side and right side of the breakpoint are  
613 dramatically reduced (as described in the Result section and shown in Figure 1e-f). To detect this,  
614 LinkedSV uses two adjacent sliding windows (twin windows, moving 100 bp) to scan the  
615 genome and calculate the barcode similarity between the twin windows. The window length can  
616 be specified by user. By default, it is  $G$  for WGS data sets and 40 kb for WES data sets.

617 The barcode similarity can be simply calculated as the fraction of shared barcodes. This method  
618 is suitable for WGS, where the coverage is continuous and uniform. But it does not perform well  
619 for WES, where the numbers of reads in the sliding windows vary a lot due to capture bias and  
620 the length of capture regions. Therefore, we use a model that considering the variation of  
621 sequencing depth and capture region positions. The barcode similarity is calculated as:

622 
$$S = \frac{x}{m_1 m_2} n e^{-\alpha d} \quad (13)$$

623 where:

624  $m_1$  is the number of barcodes in window 1,

625  $m_2$  is the number of barcodes in window 2,

626  $x$  is the number of barcodes in both windows,

627  $d$  is the weight distance between reads of the left window and the right window,

628  $n$  is a constant representing the characteristic of the library,

629  $\alpha$  is a parameter of fragment length distribution,

630  $a$  and  $b$  are two parameters between 0 and 1,

631  $n$ ,  $\alpha$ ,  $a$  and  $b$  are estimated from the data using regression. Detailed explanation of this model is  
632 in Supplementary Note 1.

633

634 Next, we calculate the empirical distribution of barcode similarity. Regions where the barcode  
635 similarity less than a threshold (5<sup>th</sup> percentile of the empirical distribution by default) were  
636 regarded as breakpoint candidates. If a set of consecutive regions have barcode similarity lower  
637 than the threshold, we only retain the region that has the lowest barcode similarity. If the barcode  
638 similarity of a breakpoint candidate is  $S_0$ , the empirical  $p$ -value is calculated as:

639 
$$p_{\text{empirical}} = \frac{\text{number of twin windows with } S \leq S_0}{\text{total number of twin windows}}. \quad (14)$$

640 The confidence score of type 2 evidence is:

641 
$$\text{Confidence score 2} = -\log_{10}(p_{\text{empirical}}). \quad (15)$$

642

643 **Combination of both types of evidence**

644 Type 1 evidence gives pairs of endpoints that indicate two genomic positions are joined in the  
645 alternative genome. Type 2 evidence gives genomic positions where the barcodes suddenly  
646 changed, regardless of which genomic position can be joined. Therefore, type 1 and type 2  
647 evidence are independent. The candidate breakpoints detected from type 2 evidence were  
648 searched against the candidate breakpoint pairs detected from type 1 evidence so that the calls  
649 were merged. The combined confidence score is:

650 
$$\text{Combined score} = \text{Confidence score 1} + \text{Confidence score 2a} + \text{Confidence score 2b}, (16)$$

651 where Confidence score 1 is the confidence score calculated from type 1 evidence (equation 12);  
652 Confidence score 2a and Confidence score 2b are the confidence scores of the two breakpoints  
653 calculated from type 2 evidence (equation 14).

654

655 **Refining breakpoints using short-read information**

656 For large SV events, we search for discordant read-pairs and clipped reads that are within 10 kb  
657 to the predicted breakpoint pairs by the above approach. We use a graph-based approach that is  
658 similar to DELLY<sup>3</sup> to cluster the discordant read-pairs. We define the supporting split-reads as

659 the clipped reads that can be mapped to the both breakpoints, and the map direction matches the  
660 SV type. If both discordant read-pairs and split-reads are found to support the SV, we use the  
661 breakpoints inferred by split-reads as the final breakpoint position.

662

### 663 **Detection of small deletions that are within 50 bp -10 kb**

664 We use a 1Mb moving window (with 0.1 Mb overlapping) to scan the genome. For each window,  
665 all the aligned reads (including phased and un-phased reads) were extracted and were assembled  
666 by the FermiKit pipeline. Regions with extreme high coverage (more than 20-fold of average  
667 coverage) were skipped. The resulting contigs were mapped back to the 1 Mb reference sequence  
668 of the moving window using bwa-mem and deletions were called from the aligned contigs if the  
669 alignments were unique within the 1 Mb moving window. The local assembly based process  
670 mainly contribute to the detection of deletions within 50-1000 bp. To detect deletions that are  
671 larger than 1 kb and might be missed by the assembly-based process, we use a 500 bp moving  
672 window (with no overlapping) to find candidate regions where the read depth of either haplotype  
673 is less than 10% of the average depth of the haplotype. Next we extract all the read pairs of this  
674 haplotype and test if the mean insert size of these read pairs is significantly larger than the mean  
675 value of the whole genome, assuming the average insert size of  $n$  read pairs follows normal  
676 distribution:  $N(\mu, \sigma^2/n)$ , where  $\mu$  and  $\sigma$  are the mean and standard deviation of the insert size of  
677 the whole genome.

678 We use a read depth based method to detect deletions that are larger than 1 kb and lack read pair  
679 support. If there are  $m$  consecutive windows where the read depths are less than 10% of the  
680 average depth, we assume the read depth of each window is independent, and calculate the  $p$   
681 value using the simple equation:  $p = (a/b)^m$ , where  $b$  is the total number moving windows and  $a$   
682 is the total number of moving windows where the read depths are less than 10% of the average  
683 depth. A deletion is called if  $p < 10^{-10}$ .

684

#### 685 **Generation of simulated linked-read WGS data set**

686 The linked reads were simulated by LRSIM, which can generate linked-reads from a given  
687 FASTA file containing the genome sequences. We generated a diploid FASTA file based on  
688 hg19 reference genome with SNPs and SVs inserted. The purpose of inserting SNPs was to  
689 mimic real data. The generation of the diploid FASTA file is described below. First, we inserted  
690 SNPs to hg19 using vcf2diploid<sup>31</sup>. The inserted SNPs were from the gold standard SNP call set  
691 (v.3.3.2) of NA12878 genome<sup>32</sup>. The vcf2diploid software generated two FASTA files, each of  
692 which was a pseudohaplotype (paternal or maternal) with the phased SNPs inserted. Next, we  
693 insert SVs into the paternal FASTA file using our custom script. The breakpoints were located in  
694 the repetitive regions in hg19 and the distance between the two breakpoints were in the range of  
695 50 kb to 10 Mb. In total, we simulated 351 deletions, 386 duplications, 353 inversions and 85  
696 translocations, all of which were in the paternal copy and were heterozygous SVs. We then

697 concatenate the paternal and maternal FAST file into a single FASTA file and simulated linked-  
698 reads using LRSIM. To mimic real data, the barcode sequences and molecule length distribution  
699 used for simulation were from the NA12878 whole-genome data set released by 10X Genomics.  
700 The number of read pairs was set to 360 million so that a 35X coverage data set was generated.  
701 The genome coordinates of simulated SVs was shown in Supplementary Data 1. The size  
702 distribution of the simulated SVs was shown in Supplementary Figure 16a.

703

#### 704 **Generation of WGS data set with low VAF**

705 In cancer samples or mosaic samples, the total DNA is a mix of a small portion of variant alleles  
706 and a large portion of normal alleles. To simulate the WGS data sets with low variant  
707 frequencies, we used the same paternal and maternal FASTA file described above but the  
708 combined FASTA file contained multiple copies of the normal allele (the maternal FASTA) and  
709 only one copy of the variant allele (the paternal FASTA). For example, to simulate a WGS data  
710 set with VAF of 20%, four copies of the maternal FASTA and one copy of the paternal FASTA  
711 were combined. The linked reads were simulated using LRSIM with the same parameters and a  
712 35X coverage data set was generated.

713

#### 714 **Simulation of deletions and duplications that cause diseases**

715 To test the performance of LinkedSV on the detection of disease casual SVs, we downloaded a  
716 list of expert-curated deletions and duplications that were known to cause CNV syndromes  
717 involved in developmental disorders. This list was downloaded from the DECIPHER database,  
718 and contained 67 CNV syndromes. Some syndromes were affected by CNV events in the same  
719 region. After removing redundant syndromes, we got 51 CNV events (Supplementary Table 10).  
720 Based on the 51 CNV events we simulated a germline WGS data set and two mosaic WGS data  
721 sets (VAF = 10% and 20%) using the same method described above.

722

### 723 **Generation of simulated linked-read WES data set**

724 To generate the linked-read WES data set, we first generate a 100X linked-read WGS data set  
725 and then down-sample it to be a WES data set. Generation of the simulated linked-read WGS  
726 data set with SNPs and SVs inserted was similar to the method described above. In total, we  
727 inserted 1160 heterozygous SVs. The SV breakpoints were randomly selected from regions that  
728 were within 2000 bp of an exon. Among the 2320 breakpoints (two breakpoints per each SV),  
729 1028 breakpoints (44.3%) were in intronic or intergenic regions. The SV sizes are in the range of  
730 50 kb to 10 Mb (Supplementary Figure 16b). Supplementary Data 2 showed the list of simulated  
731 SVs. The number of inserted SVs in the simulated WES data set was slightly smaller than that in  
732 the simulated WGS data set because the SV breakpoints were designed to reside within 2000 bp  
733 of an exon. The simulated reads were generated using LRSIM and were mapped to hg19



734 reference genome using the Longranger pipeline (default settings). The phased bam generated by  
735 Longranger was down-sampled to be a simulated WES data set. To mimic real WES data set, we  
736 used the coverage distribution of the linked-read WES data set of NA12878 genome (released by  
737 10X Genomics) to guide the down-sampling process. We bin the genome into 10 bp windows  
738 and calculate number of reads mapped to each window (left mapping positions were used) in  
739 NA12878 linked-read WES data. The simulated WES data set was generated by sampling reads  
740 from the 100X WGS data according to number of reads mapped to the same 10 bp window in the  
741 NA12878 WES. The down sampling was at read pair level, if the one read is retained, the paired  
742 read would also be retained.

743

#### 744 **Benchmarking of deletion detection on the HG002 genome**

745 The HG002 benchmark set (version 0.6) was downloaded from the FTP site: [ftp://ftp-](ftp://ftp-trace.ncbi.nlm.nih.gov/giab/ftp/data/AshkenazimTrio/analysis/NIST_SVs_Integration_v0.6/)  
746 [trace.ncbi.nlm.nih.gov/giab/ftp/data/AshkenazimTrio/analysis/NIST\\_SVs\\_Integration\\_v0.6/](ftp://ftp-trace.ncbi.nlm.nih.gov/giab/ftp/data/AshkenazimTrio/analysis/NIST_SVs_Integration_v0.6/). The  
747 benchmarking process was performed according to the authors' suggestions<sup>21</sup>. The benchmark  
748 set contains a Tier 1 benchmark regions, where all the insertions/deletions are resolved and any  
749 extra calls were putative false positives. This region covers 2.66 Gbp of the human genome. A  
750 deletion call was considered to be a true positive call if it had at least 50% reciprocal overlap (the  
751 overlapped region was more than 50% of both calls) with a deletion call with filter = PASS in the

752 Tier 1 vcf file. Otherwise, it was considered to be a false positive call. This 50% reciprocal  
753 overlapping criterion was chosen to follow what was done by a previous study<sup>33</sup>.

754 Recall, precision and F1 score were calculated as follows.

755 
$$\text{Recall} = \frac{\text{Number of true positive calls}}{\text{Total number of deletion calls with filter=PASS in the Tier 1 vcf file}}; \quad (17)$$

756 
$$\text{Precision} = \frac{\text{Number of true positive calls}}{\text{Total number of deletion calls of the query set}}; \quad (18)$$

757 
$$\text{F1 score} = \frac{2 * \text{Recall} * \text{Precision}}{\text{Recall} + \text{Precision}}. \quad (19)$$

758

## 759 **Competing Interests**

760 The authors declare no competing interests.

761

## 762 **Acknowledgments**

763 The authors would like to thank members of the Center for Applied Genomics for generating the  
764 linked read exome sequencing data on the patient with *F8* inversion and *NFI* deletion. We would  
765 like to thank the authors of the simulation software LRSIM to provide tools that facilitated our  
766 benchmarking study. This study is in part supported by NIH grant GM132713 to K. Wang.

## 767 **Data Availability**

768 The 10X Genomics sequencing data of the HX1 genome was generated in this study and can be  
769 obtained from the NCBI SRA database with the accession code SRX5781869  
770 [<https://www.ncbi.nlm.nih.gov/sra/?term=SRX5781869>].

771 The PacBio sequencing data of the HX1 genome was previously published and can be obtained  
772 from the NCBI SRA database with the accession code SRX1424851  
773 [<https://www.ncbi.nlm.nih.gov/sra/?term=SRX1424851>]. The 10X Genomics sequencing data of  
774 the HG002 genome was released by 10X Genomics and can be downloaded from  
775 <https://support.10xgenomics.com/de-novo-assembly/datasets/2.1.0/ash>.

776 Due to potential compromise of individual privacy, full datasets of the clinical samples (*F8* and  
777 *NFI*) are available from the authors on reasonable request and institutional data use agreement.  
778 All other relevant data is available upon request.

## 779 **Code Availability**

780 The source code of LinkedSV is publicly available on GitHub  
781 (<https://github.com/WGLab/LinkedSV>). A detailed description of how to use LinkedSV is also  
782 provided in the GitHub repository.

783

## 784 **Author contributions**

785 L.F. and K.W. (Kai Wang) designed the study. L.F. implemented the tool and performed the  
786 analysis. F.A.M. and R.P.S. generated the 10X Genomics sequencing data of the *F8* inversion  
787 sample and the *NFI* deletion sample and C. K. and M.V.G analyzed the data. S.W. and K.W.  
788 (Katharina Wimmer) performed targeted Illumina MiSeq sequencing of the *NFI* deletion sample  
789 and analyzed the data. M. L. and H.H. guided on method development and data analysis. L.F.  
790 drafted the manuscript. All authors read, revised, and approved the manuscript.

## 791 **References**

- 792 1. Weischenfeldt J, Symmons O, Spitz F, Korbel JO. Phenotypic impact of genomic structural  
793 variation: insights from and for human disease. *Nat Rev Genet* **14**, 125-138 (2013).
- 794
- 795 2. Ye K, Schulz MH, Long Q, Apweiler R, Ning Z. Pindel: a pattern growth approach to detect  
796 break points of large deletions and medium sized insertions from paired-end short reads.  
797 *Bioinformatics* **25**, 2865-2871 (2009).
- 798
- 799 3. Rausch T, Zichner T, Schlattl A, Stutz AM, Benes V, Korbel JO. DELLY: structural variant  
800 discovery by integrated paired-end and split-read analysis. *Bioinformatics* **28**, i333-i339 (2012).
- 801
- 802 4. Chen K, *et al.* BreakDancer: an algorithm for high-resolution mapping of genomic structural  
803 variation. *Nat Methods* **6**, 677-681 (2009).
- 804
- 805 5. Chong Z, *et al.* novoBreak: local assembly for breakpoint detection in cancer genomes. *Nat*  
806 *Methods* **14**, 65-67 (2017).
- 807

- 
- 808 6. Wala JA, *et al.* SvABA: genome-wide detection of structural variants and indels by local  
809 assembly. *Genome Res* **28**, 581-591 (2018).
- 810
- 811 7. Carvalho CM, Lupski JR. Mechanisms underlying structural variant formation in genomic  
812 disorders. *Nat Rev Genet* **17**, 224-238 (2016).
- 813
- 814 8. Payer LM, *et al.* Structural variants caused by Alu insertions are associated with risks for many  
815 human diseases. *Proc Natl Acad Sci U S A* **114**, E3984-E3992 (2017).
- 816
- 817 9. Sharp AJ, *et al.* Segmental duplications and copy-number variation in the human genome. *Am J*  
818 *Hum Genet* **77**, 78-88 (2005).
- 819
- 820 10. Chaisson MJ, *et al.* Resolving the complexity of the human genome using single-molecule  
821 sequencing. *Nature* **517**, 608-611 (2015).
- 822
- 823 11. Sedlazeck FJ, *et al.* Accurate detection of complex structural variations using single-molecule  
824 sequencing. *Nat Methods*, (2018).
- 825
- 826 12. Zheng GX, *et al.* Haplotyping germline and cancer genomes with high-throughput linked-read  
827 sequencing. *Nat Biotechnol* **34**, 303-311 (2016).
- 828
- 829 13. Luo R, Sedlazeck FJ, Darby CA, Kelly SM, Schatz MC. LRSim: A Linked-Reads Simulator  
830 Generating Insights for Better Genome Partitioning. *Comput Struct Biotechnol J* **15**, 478-484  
831 (2017).
- 832
- 833 14. Spies N, *et al.* Genome-wide reconstruction of complex structural variants using read clouds. *Nat*  
834 *Methods*, (2017).
- 835
- 836 15. Elyanow R, Wu HT, Raphael BJ. Identifying structural variants using linked-read sequencing  
837 data. *Bioinformatics*, (2017).
- 838
- 839 16. Bishara A, *et al.* Read clouds uncover variation in complex regions of the human genome.  
840 *Genome Res* **25**, 1570-1580 (2015).

- 
- 841  
842 17. Layer RM, Chiang C, Quinlan AR, Hall IM. LUMPY: a probabilistic framework for structural  
843 variant discovery. *Genome Biol* **15**, R84 (2014).
- 844  
845 18. Campbell PJ, *et al.* Identification of somatically acquired rearrangements in cancer using  
846 genome-wide massively parallel paired-end sequencing. *Nat Genet* **40**, 722-729 (2008).
- 847  
848 19. Mitelman F, Johansson B, Mertens F. The impact of translocations and gene fusions on cancer  
849 causation. *Nat Rev Cancer* **7**, 233-245 (2007).
- 850  
851 20. Stephens PJ, *et al.* Complex landscapes of somatic rearrangement in human breast cancer  
852 genomes. *Nature* **462**, 1005-1010 (2009).
- 853  
854 21. Zook JM, *et al.* A robust benchmark for germline structural variant detection. Preprint at  
855 <https://www.biorxiv.org/content/10.1101/664623v3>, (2019).
- 856  
857 22. Li H. FermiKit: assembly-based variant calling for Illumina resequencing data. *Bioinformatics* **31**,  
858 3694-3696 (2015).
- 859  
860 23. Lakich D, Kazazian HH, Jr., Antonarakis SE, Gitschier J. Inversions disrupting the factor VIII  
861 gene are a common cause of severe haemophilia A. *Nat Genet* **5**, 236-241 (1993).
- 862  
863 24. De Brasi CD, Bowen DJ. Molecular characteristics of the intron 22 homologs of the coagulation  
864 factor VIII gene: an update. *J Thromb Haemost* **6**, 1822-1824 (2008).
- 865  
866 25. Shi L, *et al.* Long-read sequencing and de novo assembly of a Chinese genome. *Nat Commun* **7**,  
867 12065 (2016).
- 868  
869 26. Huddleston J, *et al.* Discovery and genotyping of structural variation from long-read haploid  
870 genome sequence data. *Genome Res* **27**, 677-685 (2017).
- 871  
872 27. Li H. Minimap2: pairwise alignment for nucleotide sequences. *Bioinformatics* **34**, 3094-3100  
873 (2018).

- 
- 874  
875 28. Robinson JT, *et al.* Integrative genomics viewer. *Nat Biotechnol* **29**, 24-26 (2011).
- 876  
877 29. She X, *et al.* Shotgun sequence assembly and recent segmental duplications within the human  
878 genome. *Nature* **431**, 927-930 (2004).
- 879  
880 30. Startek M, *et al.* Genome-wide analyses of LINE-LINE-mediated nonallelic homologous  
881 recombination. *Nucleic Acids Res* **43**, 2188-2198 (2015).
- 882  
883 31. Rozowsky J, *et al.* AlleleSeq: analysis of allele-specific expression and binding in a network  
884 framework. *Mol Syst Biol* **7**, 522 (2011).
- 885  
886 32. Zook JM, *et al.* Integrating human sequence data sets provides a resource of benchmark SNP and  
887 indel genotype calls. *Nat Biotechnol* **32**, 246-251 (2014).
- 888  
889 33. Pendleton M, *et al.* Assembly and diploid architecture of an individual human genome via single-  
890 molecule technologies. *Nat Methods* **12**, 780-786 (2015).
- 891  
892 34. Koren S, Walenz BP, Berlin K, Miller JR, Bergman NH, Phillippy AM. Canu: scalable and  
893 accurate long-read assembly via adaptive k-mer weighting and repeat separation. *Genome Res* **27**,  
894 722-736 (2017).
- 895  
896 35. Li H, *et al.* The Sequence Alignment/Map format and SAMtools. *Bioinformatics* **25**, 2078-2079  
897 (2009).
- 898  
899 36. Ruan J, Li H. Fast and accurate long-read assembly with wtdbg2. *bioRxiv*, (2019).

900

901

---

902 **Figure Legends**

903 **Figure 1**

904 **Two types of evidence near SV breakpoints.** **a)** Type 1 evidence. Reads from HMW DNA  
905 molecules that span the breakpoints of a deletion are mapped to two genomic locations, resulting  
906 in two sets of observed fragments and two sets of newly introduced fragment endpoints (large  
907 dots). **b)** The patterns of enriched fragment endpoints indicate the SV types. Please refer to  
908 Supplementary Figures 1-3 and Supplementary Movie 1 for detailed explanations of how the  
909 patterns are formed. **c)** Enriched fragment endpoints detected near two breakpoints of a deletion  
910 on NA12878 genome. L-endpoints and R-endpoints are plotted separately. The breakpoint  
911 positions are marked by red arrows. **d)** Two-dimensional view of enriched endpoints near the  
912 two breakpoints of the deletion. Each dot indicates a pair of fragments which share the same  
913 barcode and thus may support the SV. The x-value of the dot is the position of the first  
914 fragment's R-endpoint and the y-value of the dot is the position of the second fragment's L-  
915 endpoint. The background of the 2D plot is cleaner than the 1D plot (panel c) since the fragments  
916 that do not share barcodes are excluded. **e)** Type 2 evidence. Reads from two breakpoints of an  
917 inversion being mapped to nearby positions (in the grey rectangles), resulting in decreased  
918 barcode similarity between the two nearby positions. **f)** Decreased barcode similarity near the  
919 breakpoints of an inversion on NA12878 genome. The reciprocal of barcode similarity is shown  
920 in the figure. The peaks indicate the positions of the breakpoint.

921 **Figure 2**



---

922 **Performance of LinkedSV on the simulated WGS data set. a)** Recalls, precisions and F1  
923 scores of six SV callers on the simulated WGS data set. **b)** Fragment endpoint signals of a small  
924 duplication that was missed by GROC-SVs. The peaks indicate the approximate breakpoint  
925 positions. **c)** Supporting fragments of the tandem duplication. These are fragments span the  
926 junction of the first copy and the second copy. Please refer to Supplementary Figure 1 and  
927 Supplementary Movie 1 for detailed explanations of how the patterns are formed. Horizontal  
928 lines represent linked reads with the same barcode; dots represent reads; colors indicate barcodes;  
929 dashed vertical grey lines represent breakpoint positions. **d)** Read depth distribution near the  
930 duplication region. The black lines showed the depth of reads with mapping quality  $\geq 20$  while  
931 the grey lines showed the depth of reads with mapping quality  $\geq 0$  (e.g. all reads). Red lines  
932 indicate breakpoints predicted by LinkedSV and the blue line indicate the average depth of the  
933 whole genome. **e)** Precision of breakpoints predicted by LinkedSV without checking short-read  
934 information. **f)** Precision of LinkedSV refined breakpoints using discordant read-pairs and split-  
935 reads. Source data is provided as a Source Data file.

936

### 937 **Figure 3**

938 **Performance of LinkedSV on the simulated WGS data with low variant allele frequencies.**

939 **a, b)** Recalls, precisions and F1 scores of six SV callers on the simulated WGS data set with  
940 VAF of 10% and 20%. **c)** Heap map of overlapping barcodes in chr1:193412560-194518464

---

941 (hg19 coordinates) showing an inversion that was missed by Longranger, and NAIBR (VAF =  
942 10%). The overlapping barcodes between the two inversion breakpoints can be clearly visualized  
943 (in the black circles). The heat map was plotted by the Loupe software (10X Genomics). Dots  
944 represent overlapping barcodes. **d)** Supporting fragments of the inversion detected by LinkedSV.  
945 Horizontal lines represent linked reads with the same barcode; dots represent reads; colors  
946 indicate barcodes. Predicted breakpoint positions are marked by red arrows. Source data is  
947 provided as a Source Data file.

948

949 **Figure 4**

950 **Performance of LinkedSV on the simulated WES data set. a)** Recalls, precisions and F1  
951 scores of six linked-read SV callers on the simulated WES data set. **b)** Heat map showing a  
952 deletion that was missed by NAIBR. The overlapping barcodes between the two breakpoints can  
953 be clearly visualized (in the black circles). The heat map was plotted by the Loupe software.  
954 Dots represent overlapping barcodes. **c)** Supporting fragments of the deletion detected by  
955 LinkedSV. Horizontal lines represent linked reads with the same barcode; dots represent reads;  
956 colors indicate barcodes. Predicted breakpoint positions are marked by vertical grey lines.  
957 Capture regions were shown as vertical bars in the bottom. Source data is provided as a Source  
958 Data file.

959

---

960 **Figure 5**

961 **Detection of *F8* inversion from clinical exome sequencing data.** (a) Illustration of type I  
962 inversion of *F8* gene. A portion of intron 22 has three copies in chrX (int22h-1, int22h-2, int22h-  
963 3). The inversion is induced by the homologous recombination between two inverted copies  
964 int22h-1 and int22h-3. Int22h-1 is located in intron 22 of *F8* gene and int22h-3 is located in the  
965 intergenic regions. (b) Heat map of overlapping barcodes in chrX:153916335-154862316 (hg19  
966 coordinates), plotted by the Loupe software tool. Black circles indicate overlapping barcodes  
967 near the inversion breakpoints. Dots represent overlapping barcodes. (c) Decreased barcode  
968 similarity at breakpoints detected by the twin window method of LinkedSV. Window size = 40  
969 kb (d) Supporting fragments detected by LinkedSV. Horizontal lines represent linked reads with  
970 the same barcode; dots represent reads; colors indicate barcodes. Dashed vertical grey lines  
971 represent breakpoints. Capture regions were shown as vertical bars in the bottom.

972

973 **Figure 6**

974 **Detection of *NFI* deletion from clinical exome sequencing data.** (a) Plot of linked-reads for  
975 *NFI* WES sample spanning chr17:29645000-29855000. In the normal allele (top), there are 71  
976 fragments crossing over the left breakpoint and 38 fragments crossing over the right breakpoint.  
977 In the variant allele (bottom), the linked reads are separated by a large gap. Horizontal lines  
978 represent linked reads with the same barcode; dots represent reads; colors indicate barcodes.

---

979 Dashed vertical red lines represent breakpoints. **(b)** Zoom-in plot of supporting fragments for the  
980 deletion. One read pair was found to support the deletion.

981

982 **Figure 7**

983 **Structural variants detected from linked-read WGS data of the HX1 genome. a)** Heatmap of  
984 overlapping barcodes for a 45 kb deletion on chromosome 2 (chr2:110395971-110441346, hg38  
985 coordinates), plotted by the Loupe software tool. Black circles indicate overlapping barcodes  
986 near the breakpoints. The deletion was not detected by SMRT-SV from PacBio long reads; **b)**  
987 and **c)** Alignments of PacBio reads near the breakpoints of the 45 kb deletion in chr2 in the HX1  
988 genome. Clipped reads were marked by vertical pink lines (5'-clipping) or pink arrows (3'-  
989 clipping). The figures were generated by IGV. Reads with mapping qualities equal to 0 were in  
990 white color. **d)** Read depth distribution near a 61 kb duplication region on chromosome 19  
991 (chr19:27338390-27399298, hg38 coordinates). The calculation was based on the bam file of  
992 linked-reads. Only reads with mapping quality  $\geq 20$  were counted. The dotted blue line showed  
993 the average depth across the whole genome. The predicted breakpoints were indicated by vertical  
994 red lines. The duplication was not detected by SMRT-SV using PacBio long reads; **e, f)** Aligned  
995 PacBio raw reads near the two breakpoints of the duplication, as shown in IGV. Increased  
996 alignment mismatches due to the SV were observed in **e)** (black rectangles). A clear duplication  
997 breakpoint was observed in **f)**.

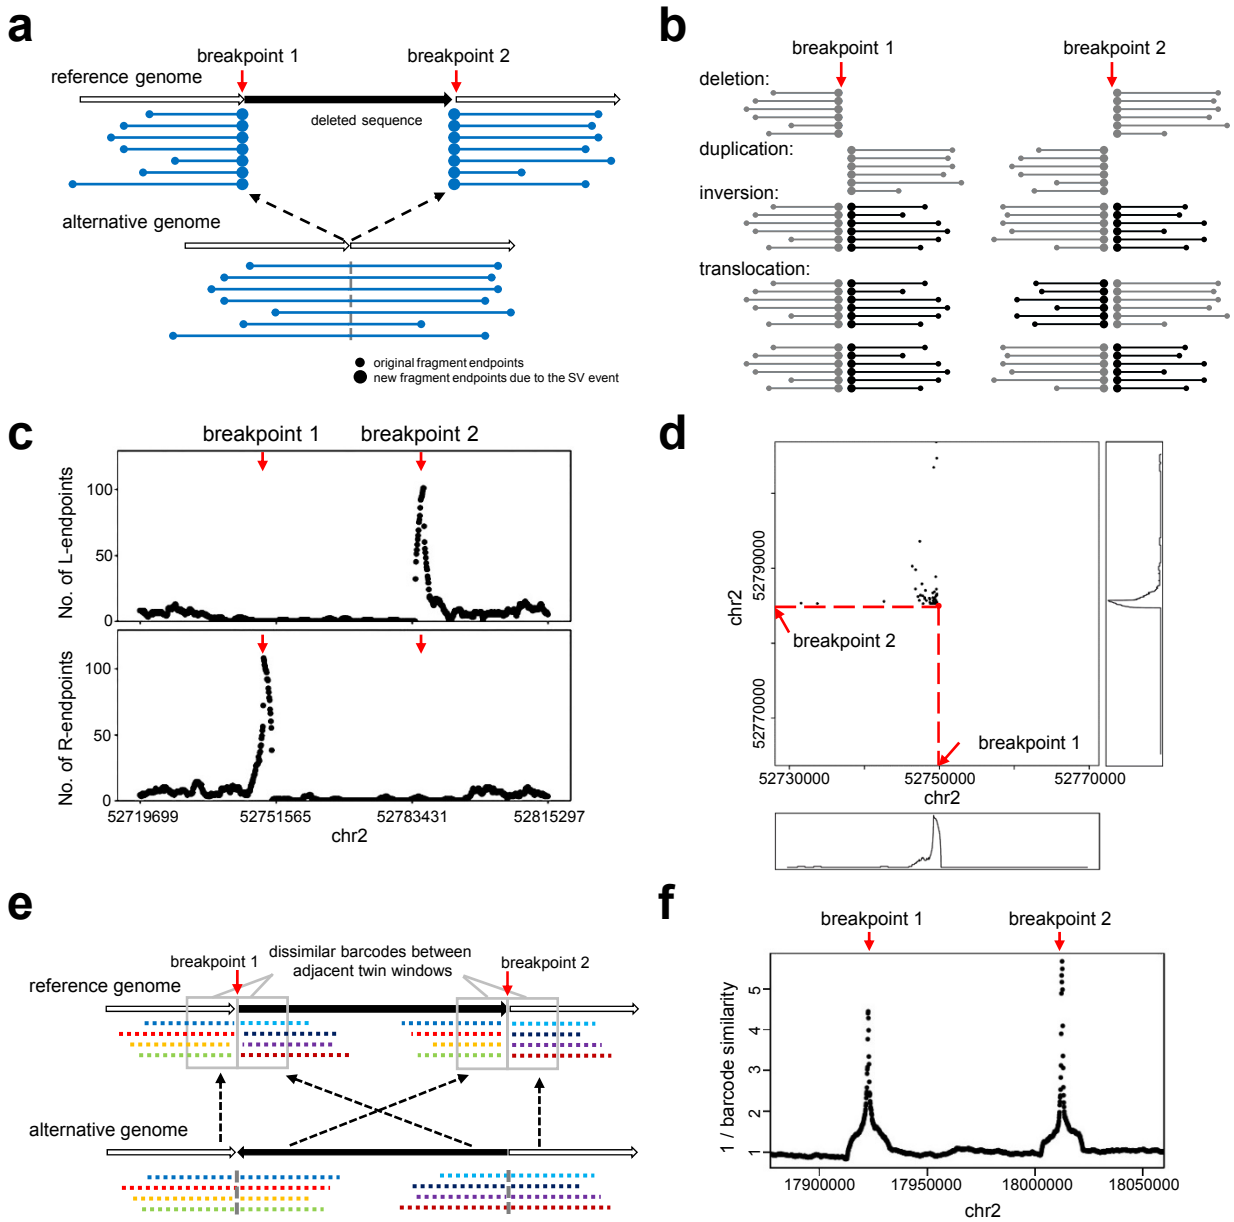

**Figure 1**

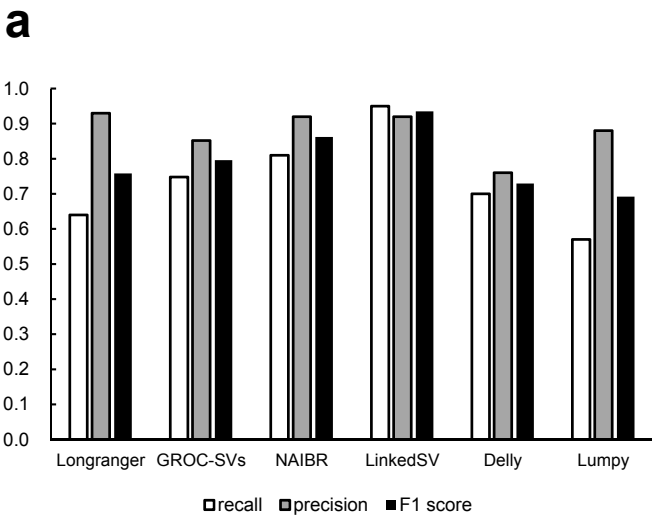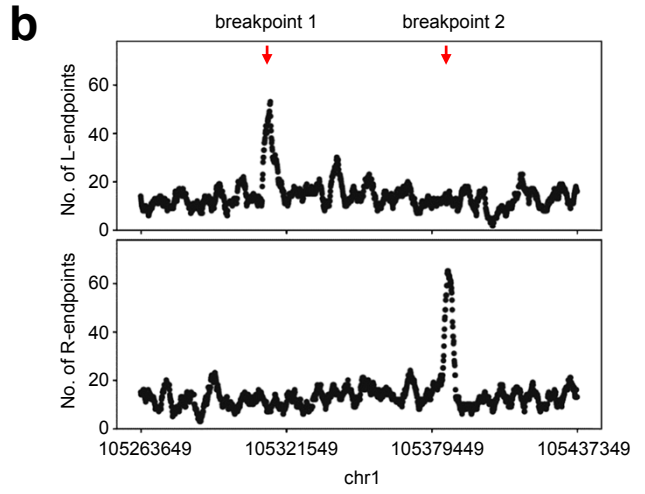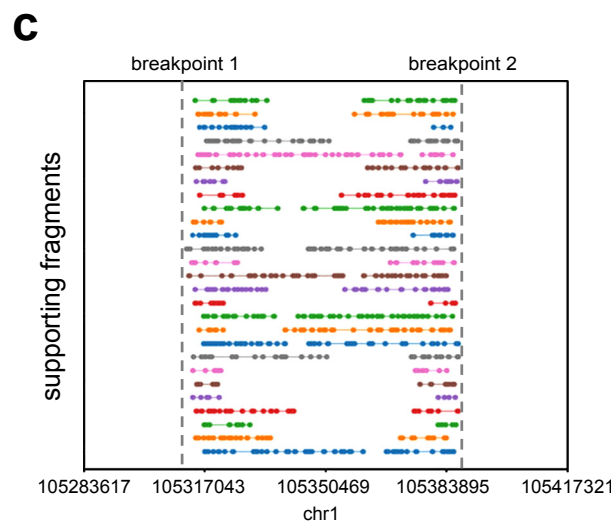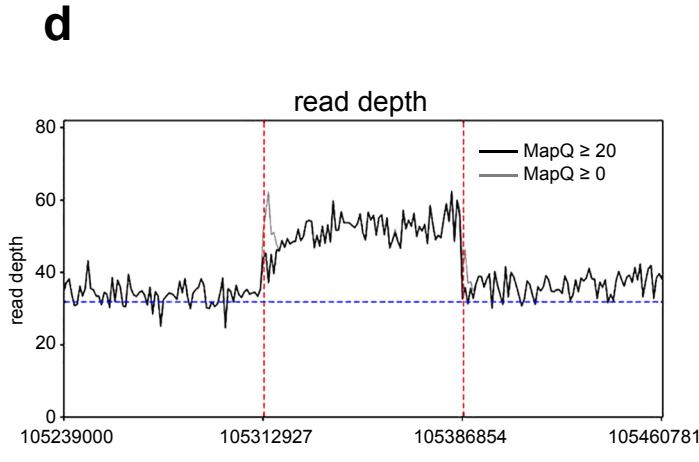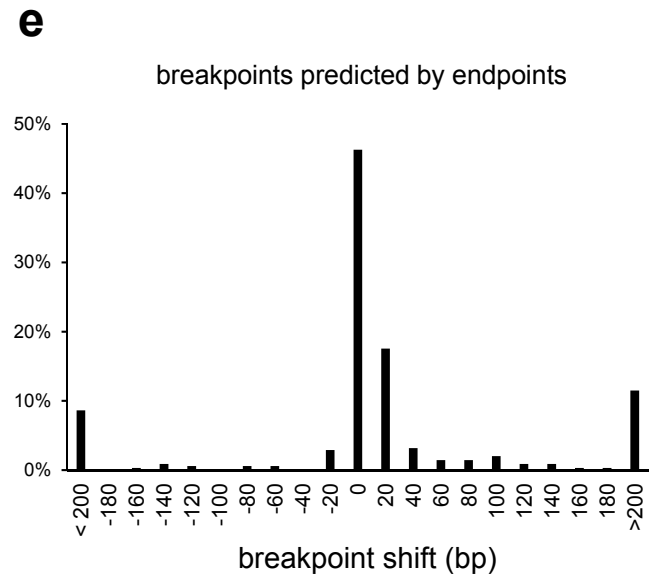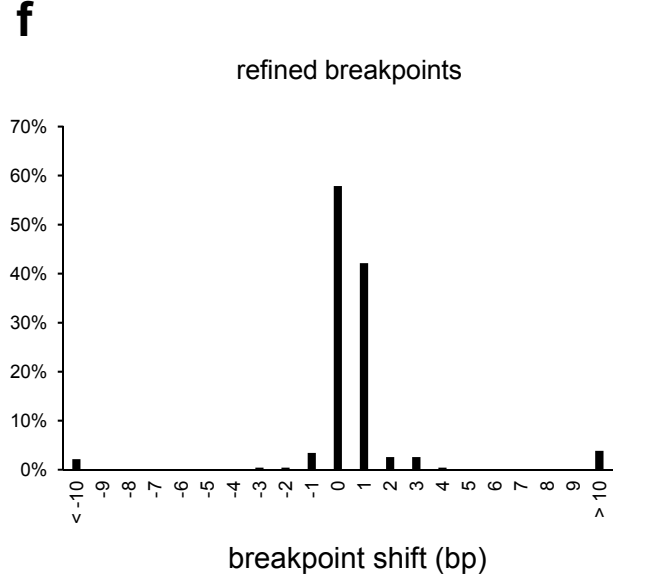

**Figure 2**

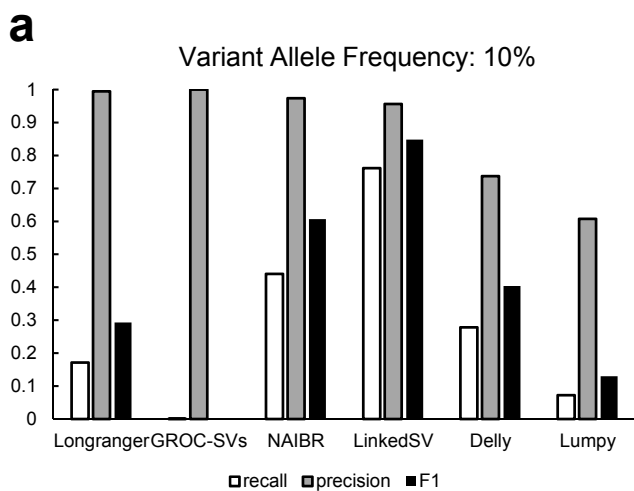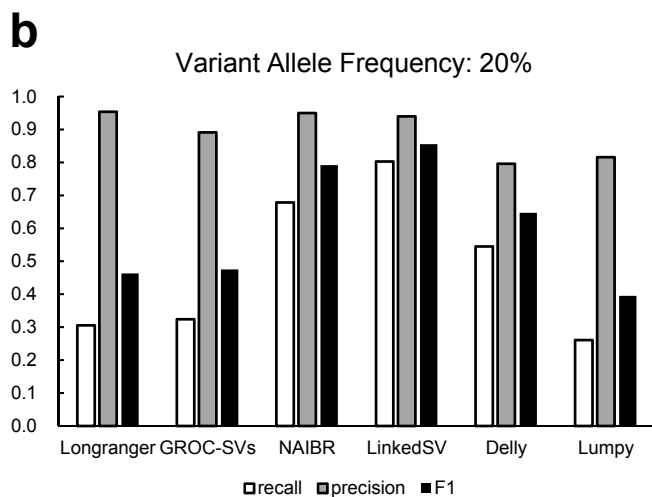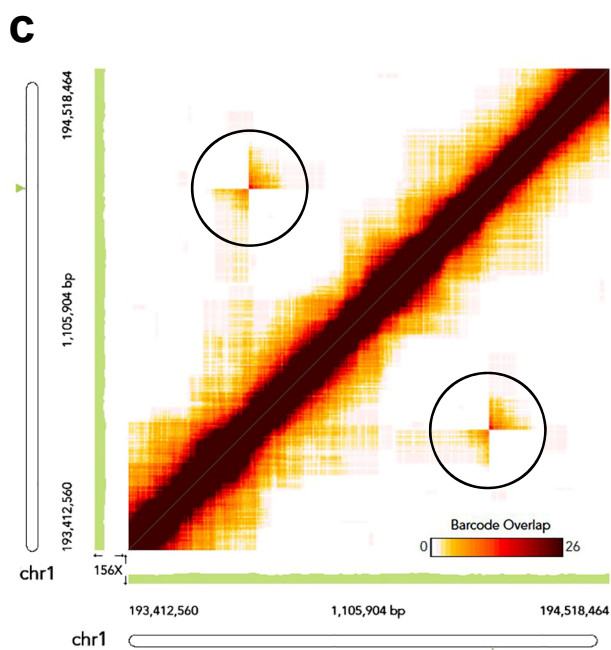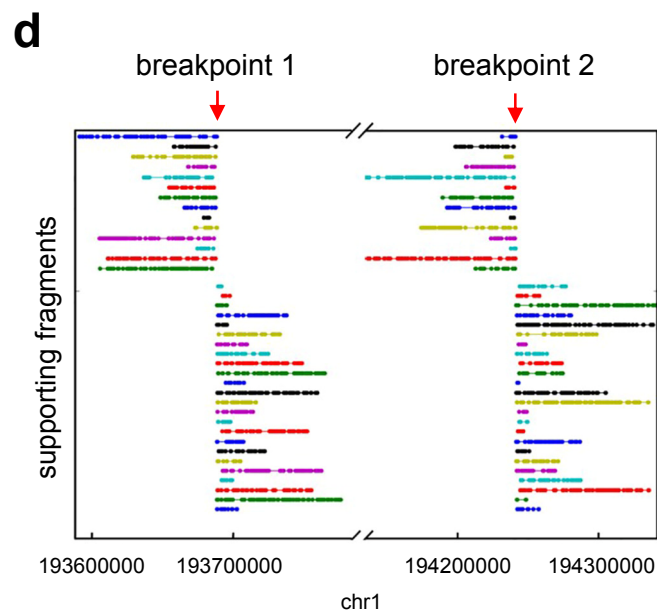

**Figure 3**

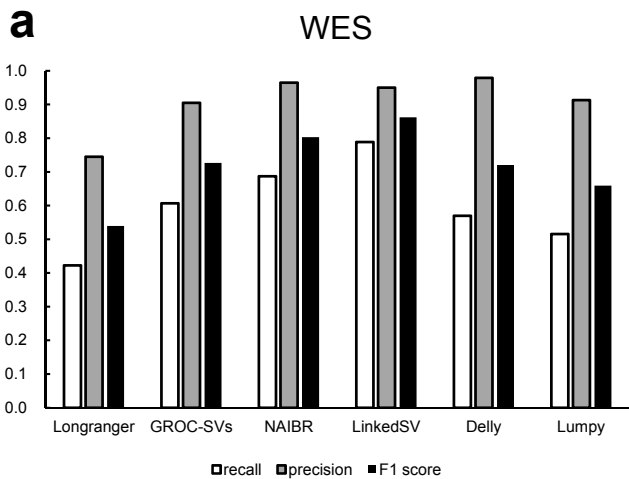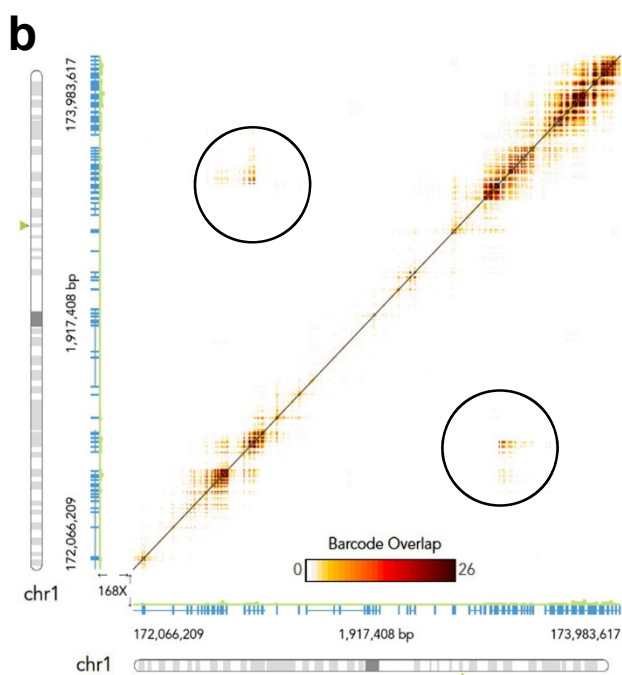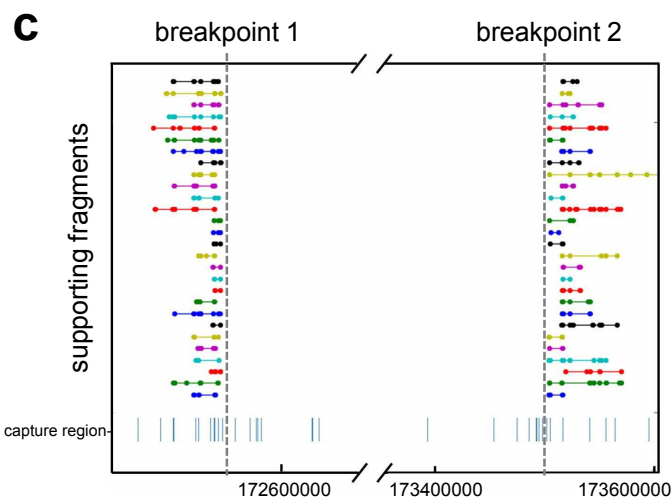

**Figure 4**



**a**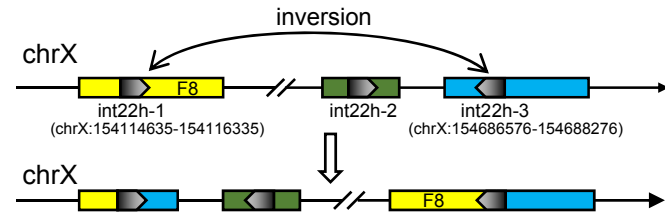**b**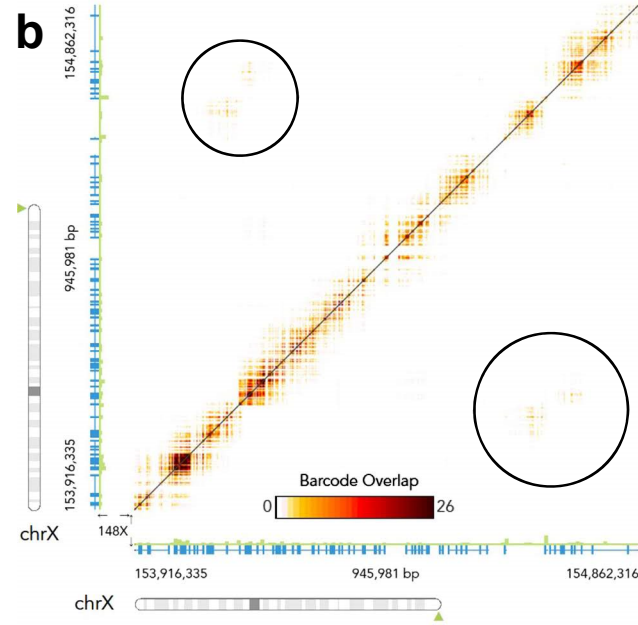**c**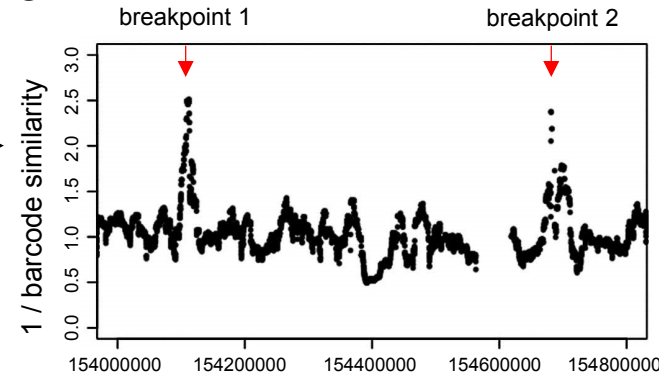**d**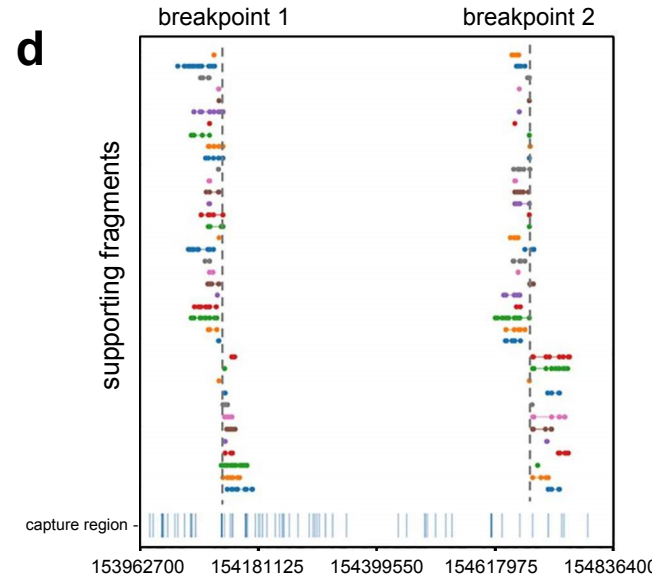**Figure 5**

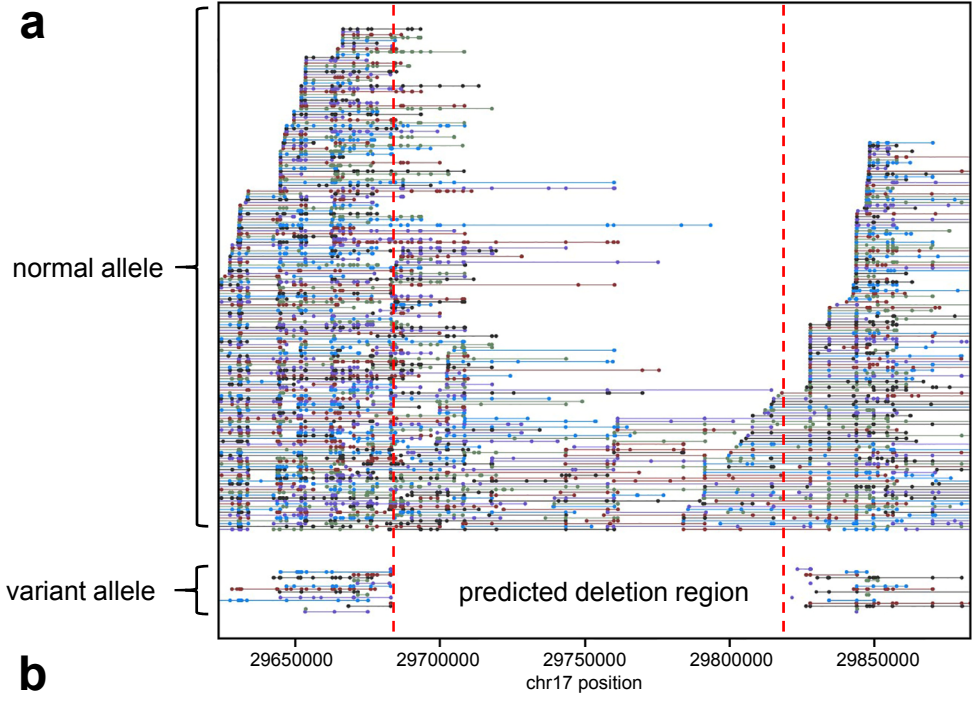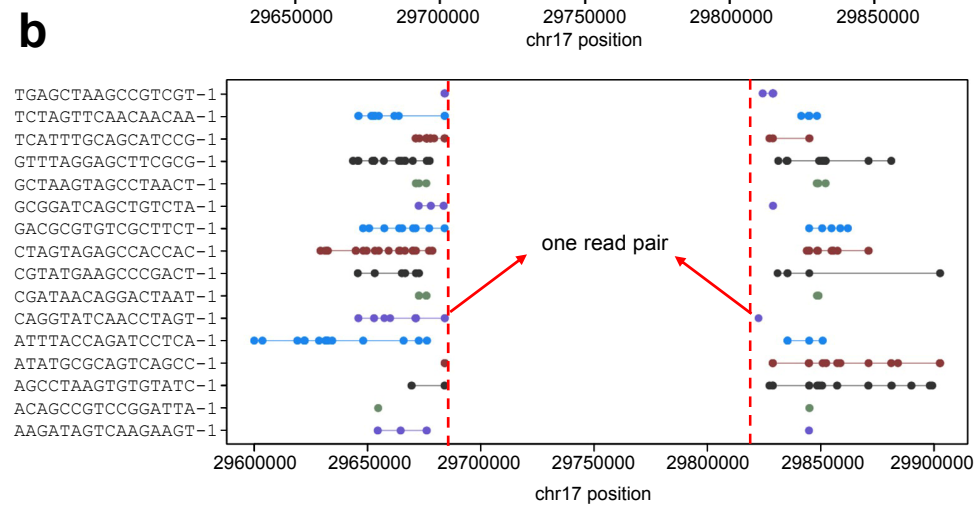

**Figure 6**

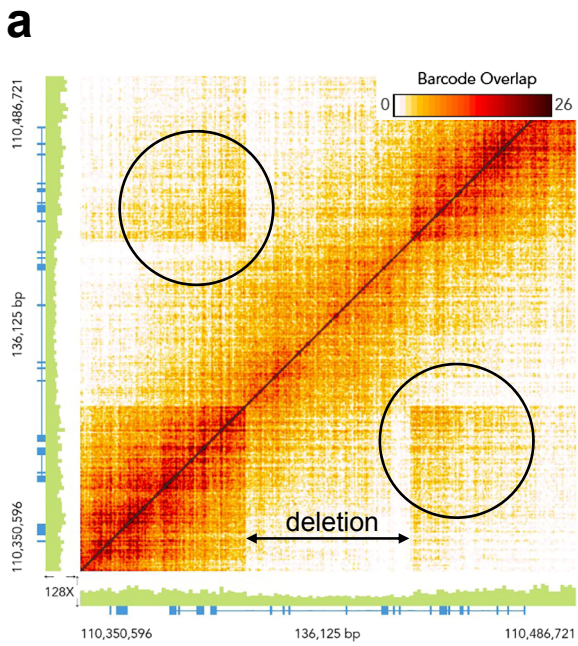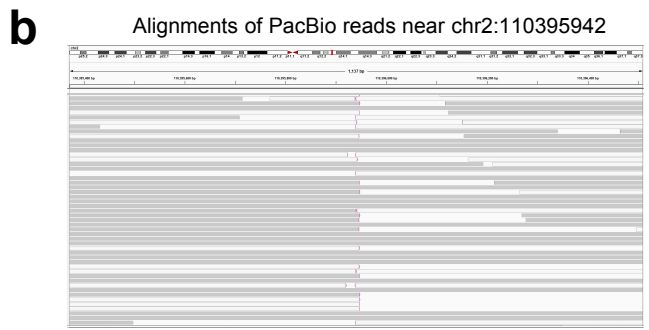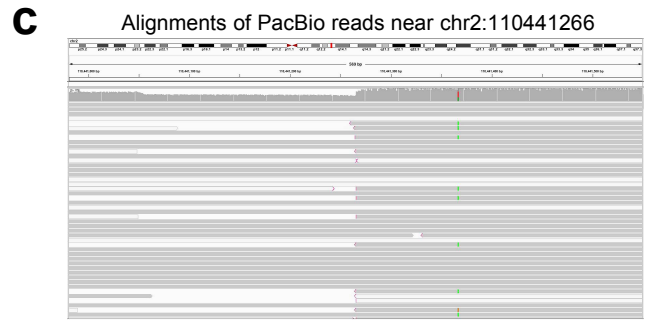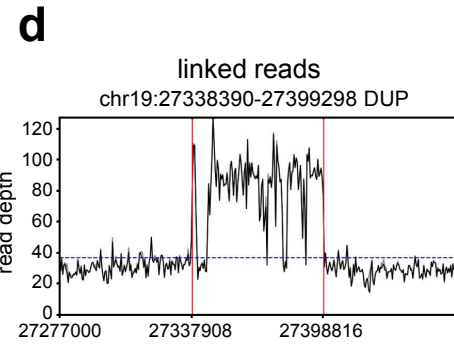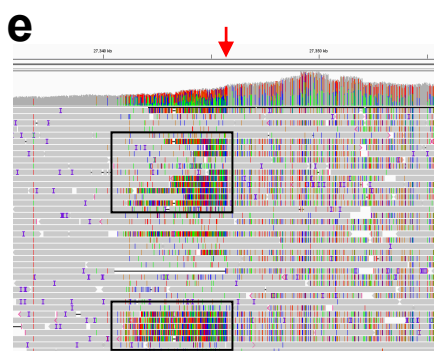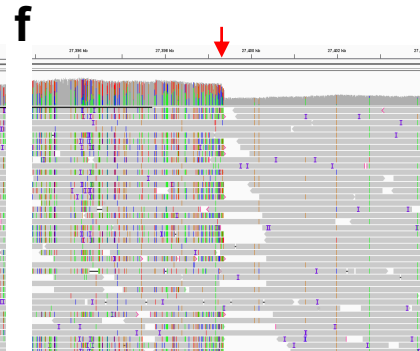

**Figure 7**
